# Supplementary material for: The Zoige pioneer plant Leymus secalinus has different endophytic bacterial community structures to adapt to environmental conditions
Source: PeerJ. 2023 May 18;11:e15363. doi: 10.7717/peerj.15363 (PMC10200098; doi:10.7717/peerj.15363)
Supplement: Data S1 [file peerj-11-15363-s006.xlsx]

## Sheet: Sheet1
group name	sample name	clean reads	OTU	Chao1	coverage	shannon	simpson
LR	LR_1	97504	1491	2519.03	0.9	8.9	0.99
	LR_2	278354	1591	2922.11	0.88	9.05	0.99
	LR_3	112527	1568	2778.27	0.89	9.04	0.99
DLR	DLR_1	310632	1374	2453.87	0.9	8.78	0.99
	DLR_2	182288	1143	2184.7	0.92	7.9	0.98
	DLR_3	284442	1111	1985.77	0.92	8.18	0.99
LL	LL_1	45884	385	486.02	0.99	6.93	0.97
	LL_2	42070	379	487.97	0.99	6.98	0.98
	LL_3	37781	342	454.45	0.99	6.75	0.97
DLL	DLL_1	43968	387	509.74	0.98	4.1	0.69
	DLL_2	46172	303	426.06	0.99	6.92	0.98
	DLL_3	24075	356	408.04	0.99	7.32	0.99
LS	LS_1	33628	289	332.76	0.99	6.27	0.97
	LS_2	58710	262	331.8	0.99	5.09	0.93
	LS_3	36765	308	376.93	0.99	5.54	0.95
DLS	DLS_1	79520	140	238.27	0.99	5.19	0.95
	DLS_2	90062	145	178.21	1	5.07	0.95
	DLS_3	47632	162	236.79	0.99	3.39	0.67
