# Supplementary material for: The Zoige pioneer plant Leymus secalinus has different endophytic bacterial community structures to adapt to environmental conditions
Source: PeerJ. 2023 May 18;11:e15363. doi: 10.7717/peerj.15363 (PMC10200098; doi:10.7717/peerj.15363)
Supplement: Supplemental Information 5 — The non-rhizosphere soil was collected in the Zoige sandy land (DL group) and laboratory (L group). [file peerj-11-15363-s005.xlsx]

## Sheet: Sheet1
Supplemental File 1：Soil physicochemical properties. The non-rhizosphere soil was collected in the Zoige sandy land (DL group) and laboratory (L group).
	pH	SOC g/kg	TN g/kg	TP g/kg	TK g/kg	N mg/kg	AP mg/kg	AK mg/kg	NH4+ mg/g	NO3- mg/kg
L	8.02	53.3582	4.05151	1.19351	3.59563	170.721	57.1271	116.427	20.5	27.0042
	8.12	50.8594	4.17126	1.11148	3.59491	173.184	63.2162	118.148	20.4	27.0992
	8.16	52.7246	4.21303	1.09461	3.66551	180.829	68.9573	117.569	20.1	27.0734
DL	8.53	2.49922	0.264626	0.833042	2.11213	8.03273	21.4625	39.3234	0.925	7.58829
	8.56	2.44476	0.250303	0.792887	2.201	7.34202	19.7228	39.7186	0.727	7.71303
	8.55	2.87314	0.244947	0.774703	2.1117	7.64583	21.2886	38.3689	0.463	7.84061
