# Supplementary material for: The Zoige pioneer plant Leymus secalinus has different endophytic bacterial community structures to adapt to environmental conditions
Source: PeerJ. 2023 May 18;11:e15363. doi: 10.7717/peerj.15363 (PMC10200098; doi:10.7717/peerj.15363)
Supplement: Table S1 [file peerj-11-15363-s003.xlsx]

## Sheet: Supplementary Data Set 2
Supplemental Table 1: The relative abundance of endophytic bacteria with Leymus secalinus at the phylum level in all samples.
phylum name	LR_1	LR_2	LR_3	DLR_1	DLR_2	DLR_3	LL_1	LL_2	LL_3	DLL_1	DLL_2	DLL_3	LS_1	LS_2	LS_3	DLS_1	DLS_2	DLS_3
p__Verrucomicrobiota	0.0508096	0.0427136	0.0459241	0.0293132	0.027359	0.0477387	0.000279174	0.0020938	0.00181463	0.00041876	0.00293132	0.00125628	0.000558347	0.0020938	0.00041876	0	0.00125628	0.00251256
p__Sumerlaeota	0.000279174	0.00041876	0.00041876	0.000558347	0.000139587	0.000139587	0	0	0	0	0	0	0	0	0	0	0	0
p__Fusobacteriota	0	0	0	0	0	0.000139587	0	0	0.000139587	0.000139587	0.000977108	0.00404802	0.000279174	0.000279174	0	0.000558347	0	0
p__Caldisericota	0	0	0	0.000139587	0.000139587	0	0	0	0	0	0	0	0	0	0	0	0	0
p__Methylomirabilota	0.000279174	0.000139587	0.000558347	0	0.000279174	0	0	0	0	0	0	0	0	0	0	0	0	0
p__Myxococcota	0.0605807	0.0845896	0.0725851	0.0823562	0.0714685	0.0272194	0.00167504	0.0020938	0.00307091	0.00251256	0.00600223	0.00404802	0.0117253	0.0138191	0.00600223	0.000279174	0.00502513	0.0032105
p__Acidobacteriota	0.104271	0.0413177	0.0893356	0.025684	0.0184255	0.0157733	0.00265215	0.000139587	0.0073981	0.00265215	0.0032105	0.00670017	0	0.00153546	0	0	0.000139587	0.000139587
p__Planctomycetota	0.0357342	0.0548576	0.0446678	0.0368509	0.0265215	0.0219151	0	0	0	0	0	0	0	0	0	0	0	0
p__Armatimonadota	0.0020938	0.00293132	0.00125628	0.000837521	0.000697934	0.00139587	0	0	0	0	0	0	0	0	0	0	0	0
p__Latescibacterota	0.0011167	0.000279174	0.00139587	0.000139587	0	0	0	0	0	0	0	0	0	0	0	0	0	0
p__Dadabacteria	0	0	0	0	0.000139587	0	0	0	0	0	0	0	0	0	0	0	0	0
p__Bacteroidota	0.069933	0.0808208	0.0886376	0.0797041	0.0281965	0.0575098	0.0397822	0.0808208	0.0287549	0.0103294	0.019263	0.046622	0.0499721	0.0149358	0.0247069	0.147543	0.0993858	0.616834
p__Chloroflexi	0.0272194	0.0445282	0.0358738	0.028057	0.0205193	0.0244277	0.000279174	0.00795645	0.00544389	0.00223339	0.00041876	0.00991066	0.000977108	0	0.000697934	0	0	0
p__WS2	0	0	0.000139587	0	0.000279174	0.000139587	0	0	0	0	0	0	0	0	0	0	0	0
p__Desulfobacterota	0.000977108	0.00279174	0.0020938	0.000697934	0.000697934	0.000558347	0	0.000139587	0.0041876	0	0	0.000279174	0	0	0.000139587	0	0	0
p__Zixibacteria	0	0.000139587	0.000279174	0	0	0	0	0	0	0	0	0	0	0	0	0	0	0
p__Proteobacteria	0.487577	0.48646	0.47641	0.363484	0.446817	0.508794	0.525265	0.621022	0.600503	0.211334	0.5811	0.396427	0.739112	0.901312	0.888749	0.543272	0.601759	0.242741
p__Entotheonellaeota	0.000558347	0.00041876	0.000558347	0	0.000139587	0	0	0	0.00139587	0	0	0	0	0	0	0	0	0
p__Halanaerobiaeota	0	0	0	0.000558347	0.000558347	0	0	0	0	0	0	0	0	0	0	0	0	0
p__Bdellovibrionota	0.0170296	0.0143774	0.00823562	0.00893356	0.00432719	0.00697934	0.00572306	0.00125628	0.00390843	0.00251256	0.000977108	0	0.00795645	0.00195422	0.00181463	0	0.000558347	0
p__FCPU426	0	0.000139587	0.000139587	0	0.000139587	0	0	0	0	0	0	0	0	0	0	0	0	0
p__unidentified	0	0	0	0	0	0	0.184534	0.00139587	0.000558347	0.0721664	0.00935232	0.0663037	0.113205	0.0266611	0.0136795	0.0254048	0.0153546	0.0117253
p__RCP2-54	0.000558347	0.000279174	0.00041876	0	0.000139587	0	0	0	0	0	0	0	0	0	0	0	0	0
p__Deinococcota	0	0	0	0.000139587	0.00041876	0.000139587	0	0	0	0	0	0	0	0	0	0	0	0
p__Dependentiae	0.000558347	0.00223339	0.00125628	0.0011167	0.00041876	0.00223339	0	0	0	0.000139587	0.00125628	0.0011167	0	0.000697934	0.000139587	0	0	0
p__Fibrobacterota	0.00865438	0.00767727	0.00474595	0.00600223	0.00279174	0.00279174	0	0	0	0	0	0.00237298	0	0	0	0	0	0
p__Gemmatimonadota	0.00432719	0.00335008	0.00544389	0.00390843	0.00251256	0.00237298	0.00614182	0.00181463	0.0020938	0.00307091	0.0143774	0.0191234	0.000139587	0.000977108	0.000837521	0.000139587	0	0
p__Campilobacterota	0.000977108	0.000139587	0.0011167	0	0	0	0.00237298	0	0	0	0	0	0	0	0	0	0.0032105	0
p__NB1-j	0.00195422	0.00153546	0.00181463	0.000139587	0.00041876	0	0	0	0.000837521	0	0	0	0	0	0	0	0	0
p__SAR324_clade_Marine_group_B	0	0.00265215	0.0011167	0.000279174	0.000139587	0.000139587	0.00139587	0.000837521	0	0	0	0	0	0	0	0	0	0
p__Elusimicrobiota	0.000279174	0.000697934	0.00181463	0.00041876	0.000279174	0.000279174	0	0	0	0	0	0	0	0	0	0	0	0
p__MBNT15	0.00041876	0.00041876	0.000558347	0	0	0	0	0	0	0	0	0	0.00041876	0	0	0	0	0
p__Patescibacteria	0.00837521	0.0245673	0.0108878	0.0318258	0.00921273	0.0343384	0.00795645	0.0262423	0.00404802	0.00195422	0.00725852	0.031407	0.0154941	0.00223339	0.00432719	0.000279174	0.00195422	0.00963149
p__Nitrospirota	0.00307091	0.000837521	0.00474595	0.000697934	0.000139587	0.00041876	0.00167504	0.000697934	0.00125628	0	0	0	0	0	0	0	0	0.000139587
p__Firmicutes	0.0353155	0.0139587	0.0244277	0.13847	0.106784	0.0650475	0.0925461	0.086823	0.10134	0.0300112	0.0845896	0.155639	0.00823562	0.00460637	0.0053043	0.0207984	0.00656058	0.0178671
p__WPS-2	0	0.000139587	0	0	0	0.000139587	0	0	0	0	0	0	0	0	0	0	0	0
p__Hydrogenedentes	0	0.000139587	0	0	0	0	0	0	0	0	0	0	0	0	0	0	0	0
p__Spirochaetota	0.00139587	0.00041876	0.000279174	0	0	0	0.00237298	0	0	0	0	0	0.000837521	0	0	0	0	0
p__Abditibacteriota	0	0.000279174	0	0.00041876	0.00041876	0.00251256	0	0	0	0.000139587	0	0.0115857	0	0	0	0.000139587	0.000139587	0.00223339
p__Actinobacteriota	0.0756561	0.0837521	0.0728643	0.159269	0.229481	0.176857	0.125349	0.166667	0.23325	0.660385	0.268286	0.24316	0.0510888	0.0288945	0.0531826	0.261586	0.264657	0.0929648
