# Supplementary material for: The Zoige pioneer plant Leymus secalinus has different endophytic bacterial community structures to adapt to environmental conditions
Source: PeerJ. 2023 May 18;11:e15363. doi: 10.7717/peerj.15363 (PMC10200098; doi:10.7717/peerj.15363)
Supplement: Table S2 [file peerj-11-15363-s004.xlsx]

## Sheet: Supplementary Data Set 3
Supplemental Table 2: The relative abundance of endophytic bacteria with Leymus secalinus at the genus level in all samples.
genus name	LR_1	LR_2	LR_3	DLR_1	DLR_2	DLR_3	LL_1	LL_2	LL_3	DLL_1	DLL_2	DLL_3	LS_1	LS_2	LS_3	DLS_1	DLS_2	DLS_3
g__Isoptericola	0	0	0	0	0	0	0	0	0	0.000558347	0.000139587	0	0	0	0	0.00348967	0.00181463	0
g__Cellvibrio	0.00153546	0.000977108	0.00348967	0	0	0	0.000139587	0.000139587	0	0	0	0	0.00293132	0	0	0.000139587	0	0
g__Tepidisphaera	0	0	0	0	0	0.000558347	0	0	0	0	0	0	0	0	0	0	0	0
g__Tahibacter	0	0.000279174	0	0.000139587	0	0.000697934	0	0	0	0	0	0	0	0.000697934	0	0	0	0
g__Sanguibacter	0	0	0	0	0	0	0.00307091	0.00488554	0.000139587	0.000279174	0.00181463	0.000558347	0	0	0	0	0	0
g__Sedimentibacter	0	0	0	0.000139587	0.000558347	0.000139587	0	0	0	0	0	0	0	0	0	0	0	0
g__Galbitalea	0	0	0	0.000697934	0.00293132	0.0032105	0	0	0	0	0	0	0	0	0	0	0	0
g__RS25G	0	0.000139587	0	0	0	0	0	0	0	0	0	0	0	0	0	0	0	0
g__Parafrigoribacterium	0	0	0	0.00181463	0.000837521	0.00348967	0	0	0	0	0	0	0	0	0	0	0	0
g__Stella	0.000139587	0	0	0	0	0	0	0	0	0	0	0	0	0	0	0	0	0
g__Janibacter	0	0	0	0	0	0	0.00153546	0.000139587	0.000558347	0.00223339	0.00376884	0.0041876	0.000139587	0.000977108	0.000279174	0.0011167	0.00237298	0
g__Sporichthya	0	0	0	0	0	0	0	0	0	0	0.00335008	0	0	0	0	0	0.000139587	0
g__Bacillus	0.0131212	0.00390843	0.0117253	0.071608	0.0410385	0.012842	0.0178671	0.0113065	0.0357342	0.00781686	0.0307091	0.0517867	0.00139587	0.00153546	0.00153546	0.000279174	0.00041876	0.000837521
g__Oceanobacillus	0	0	0	0.000139587	0	0.000139587	0	0	0	0	0	0	0	0	0	0	0	0
g__SWB02	0.00195422	0.00335008	0.00460637	0.0011167	0.000558347	0	0.000139587	0.00181463	0.00474595	0	0.000139587	0.000279174	0.000279174	0.00041876	0.00041876	0	0	0
g__Fimbriiglobus	0.00153546	0.00251256	0.00139587	0.00041876	0.00195422	0.000697934	0	0	0	0	0	0	0	0	0	0	0	0
g__Desulfovibrio	0	0.000139587	0	0	0	0	0	0	0	0	0	0	0	0	0	0	0	0
g__Halobacillus	0	0	0	0	0	0.000139587	0	0	0	0	0	0	0	0	0	0	0	0
g__OLB13	0	0.000279174	0.000139587	0.00167504	0.000139587	0.00265215	0	0	0	0	0	0	0	0	0	0	0	0
g__Legionella	0.00460637	0.0118649	0.00390843	0.00656058	0.0180067	0.0053043	0	0.000139587	0	0	0	0.000279174	0	0.00125628	0.000139587	0	0.0041876	0.000558347
g__P3OB-42	0.0032105	0.00670017	0.00390843	0.000139587	0.00041876	0.000139587	0	0	0	0	0	0	0.000279174	0	0	0	0	0
g__Pusillimonas	0	0	0	0.00167504	0	0	0	0	0	0	0	0	0	0	0	0	0	0
g__Candidatus_Bealeia	0	0	0	0	0.000279174	0	0	0	0	0	0	0	0	0	0	0	0	0
g__Streptomyces	0.0107482	0.00879397	0.0121441	0.00474595	0.0108878	0.00628141	0.0041876	0.00725852	0.042574	0.00293132	0.000697934	0.0147962	0.00139587	0.00041876	0.00041876	0.000139587	0	0.000977108
g__Geminicoccus	0	0.000139587	0	0	0	0	0	0	0	0.000139587	0.0032105	0.000279174	0	0	0.000139587	0	0	0
g__Aquimonas	0.000558347	0	0	0	0.000139587	0	0	0	0	0	0	0	0	0	0	0	0	0
g__Candidatus_Ovatusbacter	0.000837521	0.0011167	0.000697934	0.0032105	0.00167504	0.0161921	0	0	0	0	0	0	0	0	0	0	0	0
g__Mucilaginibacter	0.000279174	0.0032105	0.000279174	0.000697934	0	0.00041876	0.000279174	0.0041876	0.00223339	0	0	0	0.00181463	0.00488554	0.00041876	0	0.00223339	0.000279174
g__Reyranella	0.00181463	0.00348967	0.00432719	0.00376884	0.00223339	0.00335008	0.00223339	0.00139587	0	0.000279174	0.00348967	0.000279174	0.000697934	0.00279174	0.0011167	0.000139587	0	0
g__Ruminococcus_gnavus_group	0	0	0	0	0	0	0	0	0	0.00041876	0.0053043	0.00195422	0	0	0.000139587	0	0	0
g__uncultured_sludge_bacterium_S43	0	0.000139587	0.000279174	0	0	0	0	0	0	0	0	0	0	0	0	0	0	0
g__Kineosporia	0.000139587	0	0	0	0.000139587	0.000558347	0	0	0	0	0	0	0	0	0	0	0	0
g__Sandaracinus	0.000837521	0.00125628	0.00181463	0.000837521	0.000139587	0.00153546	0	0.000139587	0	0	0	0	0	0	0	0	0	0
g__Arenimonas	0.00041876	0.000697934	0.000279174	0.00167504	0.0011167	0.000837521	0.0020938	0	0.000837521	0	0	0	0	0	0	0	0	0
g__Lactococcus	0	0	0	0	0	0	0.00237298	0.000837521	0.00307091	0.000697934	0	0	0	0	0.00041876	0	0	0.000139587
g__Rubellimicrobium	0.000279174	0	0.000279174	0	0	0	0.00404802	0.00125628	0.00167504	0.00823562	0.040201	0.00907314	0.000139587	0	0	0.00963149	0.000837521	0.000139587
g__Filomicrobium	0.000139587	0	0	0.000139587	0.000139587	0.000139587	0	0	0	0	0	0	0	0	0	0	0	0
g__Wolbachia	0	0	0.000139587	0.0011167	0.0140983	0.000139587	0	0	0	0	0	0	0	0	0	0	0	0
g__Candidatus_Xiphinematobacter	0	0.000279174	0.00041876	0.000697934	0.000279174	0.000558347	0	0	0	0	0	0	0	0	0	0	0	0
g__UBA6140	0	0	0.000139587	0.00041876	0.00041876	0	0	0	0	0	0	0	0	0	0	0	0	0
g__Schlesneria	0.000279174	0.000139587	0	0	0	0.00041876	0	0	0	0	0	0	0	0	0	0	0	0
g__Methylobacterium-Methylorubrum	0	0	0	0	0.000139587	0.000139587	0.00907314	0.00474595	0.00446678	0.00335008	0.00460637	0.00265215	0.0138191	0.0147962	0.0117253	0.000139587	0.000977108	0.000139587
g__SH-PL14	0.00293132	0.00335008	0.00335008	0.00362926	0.00265215	0.00265215	0	0	0	0	0	0	0	0	0	0	0	0
g__Catenuloplanes	0.000139587	0	0.000139587	0	0	0	0	0	0	0	0	0	0	0	0	0	0	0
g__iron-reducing_bacterium_enrichment_culture_clone_FEA_2_H3	0	0	0	0	0.000139587	0	0	0	0	0	0	0	0	0	0	0	0	0
g__Sphingopyxis	0	0	0.000139587	0.00125628	0.00125628	0.00167504	0.00460637	0.00711893	0.00614182	0.000558347	0.00544389	0.00348967	0.00516471	0.00139587	0.0041876	0.000139587	0.00446678	0.000139587
g__Leuconostoc	0	0	0	0	0	0	0.000139587	0	0.00139587	0.000139587	0	0	0	0	0	0.00125628	0.00041876	0.00153546
g__uncultured	0.144054	0.177136	0.154523	0.13177	0.105946	0.0954774	0.0734227	0.0741206	0.0735623	0.0228922	0.0703518	0.0612786	0.036153	0.0237298	0.0397822	0.0108878	0.00348967	0.00893356
g__Terrimonas	0.00963149	0.0117253	0.00935232	0.0150754	0.00335008	0.00390843	0	0	0	0	0	0	0	0.00041876	0	0	0	0
g__Oligoflexus_tunisiensis	0	0.00041876	0.000279174	0	0	0	0	0	0	0	0	0	0	0	0	0	0	0
g__Ohtaekwangia	0.00404802	0.00614182	0.0101898	0.00307091	0.00153546	0.00404802	0	0.000139587	0.00348967	0	0	0	0.00125628	0	0.000697934	0	0	0
g__Natranaerovirga	0	0	0	0	0	0	0.00460637	0.000139587	0	0	0	0	0	0	0	0	0	0
g__Candidatus_Glomeribacter	0	0	0	0.00041876	0.000139587	0	0	0	0	0	0	0	0	0	0	0	0	0
g__Dokdonia	0.000279174	0	0	0.000279174	0	0.000977108	0	0	0	0	0	0	0	0	0	0	0	0
g__Achromobacter	0	0	0.000139587	0.000279174	0.00139587	0	0.000279174	0	0.0011167	0	0	0	0.00502513	0	0.00153546	0	0	0
g__Starkeya_novella	0	0	0	0.000139587	0.00041876	0.00041876	0	0	0	0	0	0	0	0	0	0	0	0
g__alphaI_cluster	0	0	0	0.000139587	0	0	0	0	0	0	0	0	0	0	0	0	0	0
g__Candidatus_Paracaedibacter	0	0	0	0.000139587	0	0	0	0	0	0	0	0	0	0	0	0	0	0
g__Imperialibacter	0	0	0	0.000279174	0	0	0	0	0	0	0	0	0	0	0	0	0	0
g__Clavibacter	0	0	0	0	0	0	0.00977108	0.000697934	0.000837521	0.553741	0.0115857	0.0143774	0.00348967	0	0	0.0073981	0.000139587	0.00041876
g__Polaromonas	0.000279174	0.000558347	0.00041876	0.00977108	0.0159129	0.0177275	0	0	0	0	0	0	0	0	0	0	0	0
g__Anoxybacillus	0	0	0	0	0.000139587	0	0	0	0	0	0	0	0	0	0	0	0	0
g__Porphyromonas	0	0	0	0	0	0	0	0.000139587	0	0	0	0	0	0.000279174	0	0	0	0
g__Luteimonas	0	0.000139587	0.000558347	0.00446678	0.00809604	0.00474595	0.00125628	0.00041876	0.00041876	0.000697934	0	0.00125628	0	0	0	0	0	0
g__Zoogloea	0	0	0.000139587	0	0	0	0	0	0	0	0	0	0	0	0	0	0	0
g__Flavisolibacter	0.000139587	0.00041876	0	0	0	0.000279174	0	0	0	0	0	0	0	0	0	0	0	0
g__Allorhizobium-Neorhizobium-Pararhizobium-Rhizobium	0.0174484	0.0164712	0.00977108	0.0205193	0.088498	0.0582077	0.0294528	0.0350363	0.0138191	0.00753769	0.0136795	0.0159129	0.0607203	0.0464824	0.0582077	0.102736	0.054718	0.0523451
g__Pseudorhodoferax	0	0	0	0	0	0	0.00446678	0.00293132	0.00376884	0.000139587	0	0.00041876	0.00711893	0.00335008	0.00307091	0	0.00139587	0
g__Rathayibacter	0	0	0	0	0	0	0.0011167	0.00390843	0	0.00348967	0.000139587	0.0073981	0	0	0.000279174	0.132189	0.00656058	0.0073981
g__uncultured_proteobacterium	0	0	0.00041876	0.000558347	0	0.000279174	0	0	0	0	0	0	0	0	0	0	0	0
g__Friedmanniella	0	0	0	0	0	0	0	0	0	0.00041876	0.000139587	0.0011167	0	0	0	0	0	0
g__Phenylobacterium	0.00446678	0.0020938	0.00139587	0.00139587	0.00181463	0.0032105	0.000139587	0.000139587	0	0.00167504	0.00376884	0	0.000558347	0.00041876	0.000139587	0	0	0
g__Azoarcus	0	0.000139587	0.000558347	0	0	0	0	0	0	0	0	0	0	0	0	0	0	0
g__Symbiobacterium	0	0	0	0	0.000139587	0	0	0	0	0	0	0	0	0	0	0	0	0
g__Woeseia	0.00041876	0.000139587	0.000139587	0.00125628	0.000697934	0.000139587	0	0	0	0	0	0	0	0	0	0	0	0
g__Ottowia	0.000279174	0	0	0	0	0	0	0	0	0	0	0	0	0	0	0	0	0
g__uncultured_bacterium	0.129397	0.0738414	0.113065	0.0939419	0.0707705	0.0692351	0.00572306	0.021636	0.0207984	0.00991066	0.0235902	0.0163317	0.0053043	0.00683975	0.00642099	0.0032105	0.00307091	0.000139587
g__RB41	0.000139587	0.000139587	0.000697934	0	0	0	0	0	0	0	0	0	0	0	0	0	0	0
g__Acidibacter	0.0445282	0.0536013	0.0537409	0.0263819	0.0118649	0.0124232	0.00474595	0.0011167	0.0020938	0.000837521	0.00153546	0.00586265	0.00139587	0.000279174	0	0	0	0
g__BRH-c8a	0	0	0.000139587	0	0.000139587	0	0	0	0	0	0	0	0	0	0	0	0	0
g__uncultured_delta_proteobacterium	0.00432719	0.0085148	0.00502513	0.00307091	0.000837521	0.00041876	0	0	0	0	0	0.00251256	0	0	0	0	0	0
g__Curvibacter	0	0	0	0	0	0.000139587	0	0	0	0	0	0	0	0	0	0	0	0
g__Porphyrobacter	0	0	0	0	0	0	0.00041876	0.000697934	0.000139587	0.00279174	0	0.000139587	0	0.0011167	0.00153546	0	0	0
g__Hydrogenophaga	0.00907314	0.00907314	0.0107482	0.00460637	0.020938	0.000977108	0.000139587	0.000558347	0.00181463	0.000139587	0	0.000139587	0.00642099	0.00348967	0.0032105	0	0	0
g__Rhizobium_sphaerophysae_group	0	0	0	0	0.000139587	0.00041876	0	0	0	0	0	0	0	0	0	0	0	0
g__Campylobacter	0	0	0	0	0	0	0	0	0	0	0	0	0	0	0	0	0.0032105	0
g__Thermomonas	0.000837521	0.000697934	0.000697934	0.00167504	0.00502513	0.00153546	0.000837521	0.000977108	0.000558347	0.000837521	0.00432719	0.000279174	0	0.000558347	0	0	0.000139587	0
g__Marmoricola	0.000279174	0.000279174	0	0	0	0	0.00670017	0.00348967	0.00390843	0.00223339	0	0.00279174	0	0.000558347	0.000558347	0	0	0.000139587
g__Alterococcus	0.0032105	0.00293132	0.00390843	0.000977108	0.000279174	0	0	0	0	0	0	0	0	0	0	0	0	0
g__unidentified_marine_bacterioplankton	0	0.000279174	0.00041876	0	0	0.000139587	0	0	0	0	0	0	0.000837521	0	0	0	0	0
g__Weissella	0	0	0	0	0	0	0.00181463	0.000139587	0.0100503	0.00307091	0	0.0011167	0	0	0.00041876	0.00041876	0.000279174	0.00348967
g__Variibacter	0	0	0.000139587	0.000139587	0	0	0.000558347	0	0	0	0	0	0.000139587	0.000279174	0.000139587	0.000139587	0.00335008	0
g__Phyllobacterium	0	0	0	0.000139587	0	0.000139587	0.000837521	0.000837521	0.000139587	0.00683975	0.00837521	0.00837521	0.000139587	0	0	0.00753769	0.0399218	0.00460637
g__unidentified	0.1012	0.113763	0.105667	0.0929648	0.0505304	0.0615578	0.208543	0.042574	0.0281965	0.0988275	0.0688163	0.131351	0.130932	0.0329425	0.020938	0.0367113	0.0178671	0.0212172
g__Halopeptonella	0	0	0	0	0	0	0	0	0.000139587	0.000558347	0.000139587	0.00237298	0	0.000139587	0	0	0	0
g__Dactylosporangium	0	0	0.000279174	0	0	0	0	0	0	0	0	0	0	0	0	0	0	0
g__Williamsia	0	0	0	0	0	0	0	0	0	0.000558347	0	0	0	0	0	0.00963149	0.00781686	0
g__uncultured_Anaerolineaceae_bacterium	0	0	0.000139587	0	0	0	0	0	0	0	0	0	0	0	0	0	0	0
g__Lacibacterium	0	0	0	0	0	0	0.00237298	0	0	0	0	0	0	0	0.000697934	0	0	0
g__Pseudoxanthobacter	0	0	0	0	0	0	0	0	0	0	0	0	0	0	0	0	0	0.000279174
g__Haliscomenobacter	0.000139587	0.000139587	0.000139587	0	0	0	0.000139587	0.00293132	0	0	0.000139587	0	0.000558347	0	0.000279174	0	0	0
g__Polycyclovorans	0.000139587	0.000139587	0	0	0	0	0	0	0	0	0	0	0	0	0	0	0	0
g__Cytophaga	0.000558347	0.000279174	0.00041876	0	0	0.000139587	0	0	0	0	0	0	0	0	0	0	0	0
g__Chromobacterium	0	0	0.000139587	0	0	0	0	0	0	0	0	0	0	0	0	0	0	0
g__Aeribacillus	0	0	0	0.000139587	0	0	0	0	0	0	0	0	0	0	0	0	0	0
g__Bifidobacterium	0	0	0	0	0	0	0.000279174	0.00167504	0	0	0.000139587	0	0	0	0	0	0	0
g__Dechloromonas	0.00041876	0.00628141	0.00181463	0	0	0	0	0	0	0	0	0	0	0	0	0	0	0
g__TM7	0.000139587	0.00041876	0	0.000697934	0	0.00041876	0	0	0	0	0	0	0	0	0	0	0	0
g__IMCC26207	0	0	0	0	0	0.000558347	0	0	0.000139587	0	0	0	0	0	0.000139587	0	0	0
g__Ensifer	0.0138191	0.00335008	0.00474595	0.00223339	0.00600223	0.00446678	0.0053043	0.00935232	0.0103294	0.000977108	0.00293132	0.00251256	0.0189838	0.00251256	0.0085148	0.000558347	0.0132607	0.000837521
g__Ruminococcus	0	0	0	0	0.000139587	0	0	0	0	0	0	0	0	0	0	0	0	0
g__Chryseobacterium	0	0	0	0.000697934	0.000558347	0.00167504	0.00474595	0.00865438	0.0100503	0.00167504	0.00251256	0.00516471	0.0127024	0.00251256	0.0111669	0.102178	0.00823562	0.571468
g__Pontibacter	0	0	0	0	0	0.000139587	0	0	0	0	0	0	0	0	0	0	0	0
g__Pediococcus	0	0	0	0	0	0	0	0	0	0	0	0.00125628	0	0	0	0.000279174	0	0
g__uncultured_Firmicutes_bacterium	0	0	0	0	0	0	0	0.00237298	0	0	0	0	0	0	0	0	0	0
g__Sphingoaurantiacus	0	0	0	0	0	0.000139587	0	0	0	0	0	0	0	0	0	0	0	0
g__Conexibacter	0	0	0	0	0.000139587	0	0	0	0.000139587	0.000139587	0.00279174	0	0	0	0	0	0	0
g__Clostridium_sensu_stricto_2	0.000279174	0	0.000279174	0	0	0	0	0.0020938	0.000139587	0	0	0	0	0	0	0	0	0
g__Methyloversatilis	0	0	0	0	0	0	0	0	0	0	0	0	0	0	0.000279174	0	0	0
g__Sphingobacterium	0	0	0	0	0	0	0.0115857	0.0085148	0.0053043	0.000279174	0.00041876	0	0.0174484	0.00041876	0.00404802	0.000279174	0.0135399	0.00153546
g__uncultured_Rhodospirillales_bacterium	0.000139587	0.000279174	0	0	0	0	0	0	0	0	0	0	0	0	0	0	0	0
g__Rivicola	0	0	0	0	0	0	0.000279174	0.00153546	0	0	0	0	0	0	0	0	0.000139587	0
g__Breoghania	0	0.000139587	0	0.000139587	0	0	0	0	0	0	0	0	0	0	0	0	0	0
g__Defluviitaleaceae_UCG-011	0	0	0	0	0	0	0	0	0	0	0	0.000837521	0	0	0	0	0	0
g__possible_genus_04	0.00697934	0.00348967	0.00307091	0.00544389	0.00237298	0.00167504	0	0	0	0	0	0.00237298	0	0	0	0	0	0
g__Thauera	0.000139587	0.000139587	0.000139587	0	0	0	0	0	0	0	0	0	0	0	0	0	0	0
g__Fusobacterium	0	0	0	0	0	0.000139587	0	0	0.000139587	0.000139587	0.000977108	0.00404802	0.000279174	0.000279174	0	0.000558347	0	0
g__Ilumatobacter	0.00251256	0.00362926	0.00195422	0.00279174	0.00223339	0.000977108	0	0	0.000139587	0	0	0.00167504	0.00041876	0.000139587	0.000139587	0	0	0
g__Chitinimonas	0.000139587	0.0011167	0.000139587	0	0	0	0	0	0.000697934	0	0	0	0.0011167	0.000139587	0.00167504	0	0	0
g__Burkholderia-Caballeronia-Paraburkholderia	0	0.000139587	0	0.000558347	0	0.00041876	0.00237298	0.000139587	0	0	0	0	0.000558347	0.00488554	0.121999	0	0	0.000837521
g__Romboutsia	0.000139587	0	0	0	0	0	0.000139587	0	0	0.00376884	0.000697934	0.00404802	0	0	0	0	0	0
g__Methylocaldum	0	0	0	0.000139587	0.000139587	0	0	0	0	0	0	0	0	0	0	0	0	0
g__Leptothrix	0	0	0	0	0	0	0	0	0	0.000139587	0.000139587	0	0	0.000139587	0.00167504	0	0	0.000139587
g__SD04E11	0	0	0	0	0	0	0.00153546	0.00753769	0.00516471	0.000837521	0.00041876	0.000279174	0	0	0	0	0	0
g__Rummeliibacillus	0	0	0.000139587	0.000139587	0.000279174	0	0	0	0	0	0	0	0	0	0	0	0	0
g__Turneriella	0	0.000139587	0	0	0	0	0	0	0	0	0	0	0	0	0	0	0	0
g__Sporosarcina	0.00139587	0	0.0011167	0.000279174	0.000139587	0	0	0	0.00237298	0	0	0.000279174	0	0	0.000558347	0	0	0.000279174
g__Virgisporangium	0.00041876	0.00041876	0.000977108	0.000279174	0.000139587	0	0	0	0	0	0	0	0	0	0	0	0	0
g__Azospira	0.000139587	0.000837521	0	0.000139587	0	0	0	0	0	0	0	0	0	0	0	0	0	0
g__Roseomonas_sp._OTB23	0	0	0	0	0	0	0	0	0	0	0	0	0	0.000837521	0.000139587	0	0	0
g__Pseudaminobacter	0	0	0	0	0	0	0.00167504	0.00125628	0.00139587	0.00125628	0.00390843	0.00237298	0	0.000279174	0.00041876	0	0	0
g__Falsirhodobacter	0	0.000139587	0.000139587	0	0	0	0	0	0	0	0	0	0	0	0	0	0	0
g__Rhodopseudomonas	0	0	0	0	0.000139587	0	0.00153546	0.0011167	0	0.00125628	0.000558347	0	0.0131212	0.0375489	0.0094919	0.0113065	0.0157733	0.00711893
g__uncultured_Candidatus_Dependentiae_bacterium	0	0.00041876	0.00041876	0.000279174	0	0	0	0	0	0	0	0	0	0	0	0	0	0
g__Sphingobacterium_sp.	0	0	0	0	0	0	0	0.000837521	0	0	0	0	0	0	0	0	0	0
g__Christensenellaceae_R-7_group	0.000139587	0.000139587	0	0.00041876	0.000558347	0	0	0	0	0	0	0	0	0	0	0	0	0
g__Tsukamurella	0	0	0	0	0	0	0.000139587	0	0	0	0.00041876	0	0.00279174	0	0	0.00041876	0.0124232	0
g__Azovibrio	0.000279174	0.00223339	0.0011167	0	0	0	0	0	0	0	0	0	0	0	0	0	0	0
g__Methyloceanibacter	0	0.000139587	0	0	0	0.000139587	0	0	0	0	0	0	0	0	0	0	0	0
g__uncultured_gamma_proteobacterium	0	0	0.000139587	0	0	0	0	0	0	0	0	0	0.000977108	0.000558347	0.00293132	0	0	0
g__Pelagibius	0	0	0	0	0.000139587	0	0	0	0	0	0	0	0	0	0	0	0	0
g__Mobilitalea	0	0	0.000139587	0	0.000139587	0	0	0	0	0	0	0	0	0	0	0	0	0
g__Cerasicoccus	0	0	0	0	0.000139587	0	0	0	0	0	0	0	0	0	0	0	0	0
g__uncultured_Rubrobacteria_bacterium	0	0.000139587	0.000139587	0	0	0	0	0	0	0	0	0	0	0	0	0	0	0
g__YC-ZSS-LKJ147	0	0	0	0	0	0	0	0	0	0.000139587	0.00404802	0.000279174	0	0.00041876	0	0	0	0
g__Jiangella	0.000139587	0	0	0.000139587	0.000139587	0	0	0	0	0	0	0	0	0	0	0	0	0
g__Oerskovia	0.000697934	0.000697934	0	0.000558347	0	0	0	0	0	0	0	0	0	0	0	0	0	0
g__bacterium_enrichment_culture_clone_R1492-5	0.000139587	0.000558347	0.00041876	0	0.000279174	0.000279174	0	0	0	0	0	0	0	0	0	0	0	0
g__Skermanella	0.000279174	0.000279174	0.000279174	0	0	0	0.000558347	0	0.00153546	0.000139587	0.00153546	0.000279174	0.00041876	0	0.000139587	0	0	0
g__Helicobacter	0	0	0	0	0	0	0.00237298	0	0	0	0	0	0	0	0	0	0	0
g__Longilinea	0.00041876	0	0.000279174	0	0	0	0	0	0	0	0	0	0	0	0	0	0	0
g__Afipia	0.000697934	0	0.000139587	0.000977108	0.000837521	0.0107482	0	0	0	0	0	0	0	0	0	0	0	0
g__Bacteriovorax	0.00181463	0.00041876	0.000837521	0.000279174	0	0	0	0	0	0	0	0	0	0	0	0	0	0
g__Arthrobacter	0.000279174	0	0.000279174	0.00362926	0.00362926	0.00335008	0	0	0	0	0	0	0	0	0	0	0	0
g__AAP99	0	0	0	0	0	0	0.00153546	0.00279174	0.00181463	0	0	0	0.000279174	0.00614182	0.000279174	0	0	0
g__uncultured_Burkholderiales_bacterium	0.000279174	0.000279174	0.000139587	0	0	0	0	0	0	0	0	0	0	0	0	0	0	0
g__Tepidamorphus	0	0	0	0.000279174	0	0	0	0	0	0	0	0	0	0	0	0	0	0
g__IMCC26134	0	0.000139587	0.000139587	0	0	0	0	0	0	0	0	0	0	0	0	0	0	0
g__Aurantisolimonas	0.000279174	0	0.000279174	0	0	0	0	0	0	0	0	0	0	0	0	0	0	0
g__Rhizobacter	0.0132607	0.0107482	0.0135399	0.00348967	0.0011167	0.00265215	0	0	0	0.00293132	0	0.000139587	0.000697934	0.00223339	0.000558347	0	0	0
g__Agrococcus	0	0	0.000139587	0	0.000139587	0	0	0	0	0	0	0	0	0	0	0	0	0
g__Massilia	0.0113065	0.00041876	0.00544389	0.000279174	0.000279174	0.000837521	0	0.000279174	0.000977108	0.000279174	0.00488554	0.00474595	0.000139587	0	0	0.0329425	0.00167504	0.0032105
g__Sporacetigenium	0.000139587	0.000139587	0	0	0.000139587	0	0.0011167	0	0	0	0	0	0	0	0	0	0	0
g__Noviherbaspirillum	0.00139587	0.000837521	0.00279174	0	0	0.00041876	0.000139587	0.000558347	0.000139587	0.000837521	0.000139587	0.00362926	0	0	0	0	0.00125628	0
g__Aneurinibacillus	0.000139587	0	0	0.0020938	0.00125628	0	0	0	0	0	0	0	0	0	0	0	0	0
g__Aeromonas	0	0	0	0	0	0	0	0	0	0.000139587	0	0.000139587	0	0	0.000139587	0.00279174	0	0
g__Candidatus_Symbiobacter	0.0011167	0.000697934	0.000697934	0.000279174	0.000139587	0.000279174	0	0	0	0	0	0	0	0	0	0	0	0
g__Thioflavicoccus	0	0.000139587	0	0	0	0	0	0	0	0	0	0	0	0	0	0	0	0
g__Chondromyces	0	0	0	0	0	0	0	0	0	0	0	0	0	0.00125628	0.000139587	0	0	0
g__Pseudorhodoplanes	0.0011167	0.00237298	0.00125628	0.00586265	0.00362926	0.00600223	0	0.000279174	0.00125628	0.000279174	0	0.00251256	0	0.000139587	0.000139587	0	0	0.000697934
g__Anaerocolumna	0	0.000139587	0	0	0	0	0.000139587	0	0.000977108	0	0	0	0	0	0	0	0	0
g__Planctomicrobium	0.000977108	0.0011167	0.00041876	0.000697934	0.00139587	0	0	0	0	0	0	0	0	0	0	0	0	0
g__Candidatus_Alysiosphaera	0	0.000139587	0.000139587	0	0.000139587	0	0.000139587	0.000279174	0.00376884	0.00167504	0.00153546	0.0094919	0	0	0	0	0	0
g__Citricoccus	0	0	0.000139587	0	0	0	0	0	0	0	0	0	0	0	0	0	0	0
g__Pseudokineococcus	0	0	0	0	0	0	0.000279174	0.00460637	0	0	0.000139587	0	0	0	0.000139587	0	0	0
g__uncultured_Nautiliales_bacterium	0	0	0	0	0	0.000139587	0	0	0	0	0	0	0	0	0	0	0	0
g__Azospirillum	0.000139587	0.00041876	0.000558347	0	0	0	0	0	0.000697934	0	0	0	0.0164712	0.0872418	0.0205193	0.000139587	0	0.000139587
g__Paucibacter	0.0219151	0.00656058	0.0205193	0.000279174	0.000139587	0.000139587	0	0.000279174	0	0.000279174	0	0	0.00251256	0.0011167	0.000558347	0	0	0
g__Labrys	0	0	0.000279174	0	0.000139587	0	0.00293132	0.00293132	0.00516471	0	0	0	0.00362926	0.00586265	0.0107482	0.000139587	0	0
g__Rhodomicrobium	0.00390843	0.0115857	0.00977108	0.00125628	0.00181463	0.0011167	0.00139587	0.00516471	0.00823562	0	0	0.000139587	0.000837521	0	0	0.000139587	0	0.000279174
g__Sphingomonas	0.00446678	0.00279174	0.00237298	0.00139587	0.00125628	0.00544389	0.0439698	0.0322446	0.0149358	0.0294528	0.048297	0.0450865	0.0174484	0.0836125	0.0284757	0.00977108	0.0073981	0.00432719
g__Sphingosinicella	0	0	0	0	0	0.000139587	0.00293132	0	0	0	0	0	0	0	0	0	0	0
g__Desulfitobacterium	0	0	0	0.000279174	0.000139587	0	0	0	0	0	0	0	0	0	0	0	0	0
g__Paeniglutamicibacter	0	0	0	0.000697934	0.00153546	0.00041876	0	0	0	0	0	0	0	0	0	0	0	0
g__Jahnella	0	0	0.000139587	0	0	0	0	0	0	0	0	0	0	0	0	0	0	0
g__uncultured_Chelatococcus_sp.	0	0	0	0	0	0	0	0	0	0	0	0	0	0	0.000279174	0	0	0
g__oc32	0	0	0.000139587	0	0	0	0	0	0	0	0	0	0	0.000139587	0	0	0	0
g__Cereibacter	0.000139587	0.00041876	0.000279174	0.000139587	0.000837521	0	0	0	0	0	0	0	0	0	0	0	0	0
g__Roseiflexus	0.000279174	0.000837521	0.00041876	0	0	0	0	0	0	0	0	0	0	0	0	0	0	0
g__Delftia	0	0	0.00041876	0	0	0.000139587	0.00139587	0.00153546	0.000837521	0.000279174	0.00125628	0	0.0020938	0	0.0011167	0.00572306	0.000139587	0.000279174
g__Rahnella1	0	0	0	0	0	0	0.000558347	0.00223339	0	0.000139587	0	0	0	0	0	0	0	0.00279174
g__uncultured_marine_bacterium	0	0	0	0.000279174	0.000139587	0.00153546	0	0	0	0	0	0	0	0	0	0	0	0
g__Candidatus_Metachlamydia	0	0	0	0	0	0	0	0.000139587	0.00139587	0.000279174	0.00153546	0.000279174	0	0	0	0	0.00125628	0.00195422
g__uncultured_Candidatus_Saccharibacteria_bacterium	0	0	0	0	0	0.000139587	0	0	0	0	0	0	0	0	0	0	0	0
g__Cloacibacterium	0	0	0	0	0	0	0	0	0	0.000139587	0	0.00307091	0	0	0	0	0	0
g__Lactobacillus	0	0	0	0	0	0	0.00516471	0.000139587	0.00921273	0.00348967	0.00139587	0.0470408	0.000558347	0.000139587	0	0.0182859	0.00125628	0.000558347
g__Aeromicrobium	0	0	0.000139587	0.0011167	0.0032105	0.00265215	0.000837521	0.00195422	0.00642099	0.00279174	0.00935232	0.00711893	0.00153546	0	0.000139587	0.00307091	0.0201005	0.00809604
g__Ellin6055	0	0	0.000279174	0.000279174	0.000139587	0.000837521	0.0101898	0.00711893	0.00195422	0.00125628	0.0073981	0.00041876	0.00223339	0	0.00181463	0	0.000139587	0
g__uncultured_Alphaproteobacteria_bacterium	0.000139587	0.000837521	0.000279174	0.0011167	0.000977108	0.000279174	0.00139587	0	0.000837521	0	0	0	0	0.000279174	0	0	0	0
g__Kocuria	0	0	0	0.000558347	0.000139587	0	0.00642099	0.00153546	0.000139587	0.0011167	0.0020938	0.00432719	0.000279174	0.000139587	0.000139587	0.00041876	0.00153546	0.00041876
g__Terribacillus	0	0	0	0.000139587	0.000279174	0	0	0	0	0	0	0	0	0	0	0	0	0
g__Mycobacterium	0.000558347	0.000279174	0.00041876	0.000558347	0.000837521	0.00265215	0.00432719	0.0136795	0.0120045	0.00223339	0.00670017	0.0251256	0.0118649	0.00125628	0.00195422	0.000977108	0.0135399	0.0114461
g__Clostridium_sp._CJT-3	0	0	0	0.000139587	0.000139587	0	0	0	0	0	0	0	0	0	0	0	0	0
g__Dolosigranulum	0	0	0	0	0	0	0	0	0	0	0	0	0	0.000139587	0	0	0	0.0011167
g__Leucobacter	0.000139587	0	0	0.000279174	0	0	0	0	0	0	0	0	0	0	0	0	0	0
g__Nubsella	0	0	0	0	0	0	0.00362926	0.0041876	0	0.000139587	0	0	0.000139587	0.000697934	0	0.0118649	0.000139587	0
g__Dialister	0	0	0	0	0	0	0.000837521	0	0	0	0	0	0	0	0	0	0	0
g__Desulfacinum	0.000139587	0.000139587	0	0	0	0	0	0	0	0	0	0	0	0	0	0	0	0
g__Edaphobaculum	0.000139587	0.000279174	0	0	0	0.000139587	0	0	0	0	0	0	0.000558347	0	0.000139587	0	0	0
g__Neisseria	0	0	0	0	0	0	0.000279174	0	0.0032105	0.000697934	0.000139587	0.00488554	0.0011167	0.000558347	0.000279174	0	0	0.00348967
g__Hyphomicrobium	0.00404802	0.00614182	0.00474595	0.0101898	0.00767727	0.0094919	0.000837521	0.00711893	0.00837521	0.000139587	0.00390843	0.00041876	0.00237298	0.00195422	0.000697934	0	0	0
g__TM7a	0	0	0.000139587	0.000139587	0.000279174	0.000837521	0.000139587	0.0011167	0.000139587	0.000139587	0.000139587	0.00432719	0	0	0	0	0	0.00488554
g__uncultured_planctomycete	0.000279174	0.000558347	0.000139587	0	0.000139587	0	0	0	0	0	0	0	0	0	0	0	0	0
g__Pelosinus	0.000139587	0.000139587	0	0	0	0	0	0	0	0	0	0	0	0	0	0	0	0
g__Brevibacillus	0.000279174	0.000558347	0.00041876	0.00865438	0.0073981	0.00041876	0.00711893	0.00125628	0.000139587	0.000139587	0.00781686	0.00516471	0.000139587	0	0	0	0	0
g__Microvirga	0.00195422	0.000837521	0.00279174	0.000697934	0.000558347	0.000837521	0.000279174	0.000697934	0.000139587	0.000139587	0	0.00600223	0	0	0.000279174	0	0	0
g__Kibdelosporangium	0.000837521	0.000558347	0.000279174	0	0	0	0	0	0	0	0	0	0	0	0	0	0	0
g__Caenimonas	0.000697934	0	0.000279174	0	0.000279174	0.00348967	0	0.000139587	0	0.00153546	0.0032105	0.00237298	0.000558347	0	0	0.000139587	0	0
g__Iamia	0.00167504	0.00125628	0.00139587	0.00572306	0.00307091	0.00711893	0.00125628	0.0100503	0.00237298	0.00265215	0.010469	0.00544389	0	0.000139587	0.000139587	0	0.000837521	0
g__Pseudonocardia	0.000558347	0.000977108	0.000279174	0.000279174	0.000139587	0.000139587	0	0.000139587	0.000697934	0.00041876	0.00390843	0.00041876	0.000139587	0.000279174	0.000697934	0	0	0
g__Tepidiphilus	0	0	0	0	0	0	0	0	0	0	0	0	0	0	0	0	0.000977108	0
g__uncultured_Desulfobacteraceae_bacterium	0.000139587	0	0	0	0	0	0	0	0	0	0	0	0	0	0	0	0	0
g__Prosthecobacter	0.000279174	0.000139587	0	0.000139587	0.000279174	0.00153546	0	0	0	0	0	0	0	0	0	0	0	0
g__Dinghuibacter	0.000139587	0.00041876	0	0	0	0	0	0	0	0	0	0	0	0	0	0	0	0
g__Simplicispira	0	0	0	0	0	0	0.000139587	0	0	0.000139587	0.000139587	0	0	0	0	0.000697934	0.000279174	0.000279174
g__Sva0996_marine_group	0	0	0	0	0.000139587	0	0	0	0	0	0	0	0	0	0	0	0	0
g__Subsaxibacter	0	0	0	0.000558347	0.00041876	0	0	0	0	0	0	0	0	0	0	0	0	0
g__Actinomyces	0	0	0	0	0	0	0.000558347	0.000279174	0.000977108	0.000558347	0.00139587	0	0.000139587	0	0.000279174	0	0	0.00265215
g__Hydrogenophilus	0	0	0	0	0	0	0	0	0	0.000279174	0.000139587	0.00474595	0	0	0	0	0	0
g__Caldicoprobacter	0	0	0	0	0.000139587	0	0	0	0	0	0	0	0	0	0	0	0	0
g__Trichococcus	0	0	0	0	0	0	0	0	0	0.000837521	0	0	0	0	0	0	0	0
g__Pseudolabrys	0.000139587	0.000837521	0.000697934	0.0011167	0.00251256	0.00390843	0.00600223	0.00237298	0.0032105	0.000558347	0.0073981	0.000279174	0	0.00558347	0.000977108	0.000139587	0	0.000139587
g__Georgenia	0	0	0	0.000139587	0	0	0	0	0	0	0	0	0	0	0	0	0	0
g__uncultured_Rhizobiaceae_bacterium	0	0	0.000139587	0	0	0	0	0	0	0	0	0	0	0	0	0	0	0
g__Novosphingobium	0.000139587	0.000977108	0.000558347	0.000279174	0.000279174	0.000558347	0.0134003	0.00809604	0.00181463	0.00195422	0.00125628	0.00991066	0.0368509	0.00670017	0.0407594	0.00767727	0.010469	0.000139587
g__Clostridium_sensu_stricto_5	0	0	0	0	0	0	0	0	0.000977108	0	0	0	0	0	0	0	0	0.000139587
g__Arcticibacter	0.00041876	0.000139587	0.00041876	0	0	0	0.000139587	0.00432719	0	0	0	0	0	0	0	0	0	0
g__Cellulosimicrobium	0	0	0	0.000279174	0.000279174	0	0	0	0	0	0	0	0	0	0	0	0	0
g__Lachnotalea	0	0.000139587	0	0	0	0	0	0	0	0	0	0	0	0	0	0	0	0
g__Qipengyuania	0	0.000139587	0.00041876	0	0.000139587	0	0	0.00223339	0	0	0	0	0	0	0	0	0	0.00041876
g__uncultured_Verrucomicrobia_bacterium	0.000139587	0	0.000558347	0	0	0.000139587	0	0	0	0	0	0	0	0	0	0	0	0
g__Flavobacterium	0.00697934	0.00446678	0.00823562	0.000977108	0.00125628	0.00991066	0.0085148	0.0258236	0.00195422	0.000558347	0.00139587	0.0178671	0.00544389	0.00125628	0.000697934	0.00502513	0.00460637	0.00488554
g__Hirschia	0.0011167	0.0011167	0.00153546	0.000139587	0.000279174	0.000139587	0.000279174	0.00139587	0	0	0	0	0.000279174	0.0011167	0.00125628	0	0	0
g__JTB255_marine_benthic_group	0.000279174	0	0	0	0	0	0	0	0	0	0	0	0	0	0	0	0	0
g__Peredibacter	0.000279174	0	0	0.000279174	0	0.000279174	0	0.000139587	0.00181463	0	0	0	0	0.000279174	0.00041876	0	0	0
g__Acidobacteria_bacterium_LWQ13	0.000279174	0	0.000139587	0	0	0	0	0	0	0	0	0	0	0	0	0	0	0
g__Rubrobacter	0	0	0	0	0	0	0	0	0	0.0011167	0.0032105	0.000977108	0.000139587	0	0	0	0	0
g__uncultured_Rubrobacterales_bacterium	0	0	0	0	0	0	0	0.00041876	0	0	0	0	0	0	0	0	0	0
g__Planomicrobium	0	0	0	0.000279174	0.000279174	0	0	0	0	0.00125628	0	0.000139587	0	0	0	0	0	0
g__Renibacterium	0	0	0	0	0	0	0.00279174	0.00404802	0	0	0	0	0.000697934	0.000139587	0.00223339	0	0.00474595	0
g__Polyangium	0.00153546	0.000697934	0.000697934	0	0	0	0	0.000139587	0.00153546	0	0	0	0	0.000139587	0	0	0	0
g__Enterococcus	0	0	0	0	0	0	0.000697934	0.00041876	0.00837521	0.00153546	0	0.0073981	0	0	0.000279174	0	0	0.00223339
g__Taibaiella	0.000139587	0.00195422	0.000139587	0	0.000139587	0.000139587	0	0.00223339	0	0	0.000139587	0	0	0.000139587	0	0	0	0
g__PMMR1	0	0	0	0	0	0	0	0	0	0.000139587	0	0.000139587	0	0.000139587	0.000279174	0	0	0
g__Variovorax	0	0	0	0	0	0	0.00376884	0.00293132	0.00544389	0.00265215	0.0131212	0.0120045	0.00614182	0.0288945	0.0120045	0.0341988	0.069933	0.0240089
g__Limnohabitans	0.0020938	0.000139587	0.00139587	0.000139587	0	0	0	0	0	0	0	0	0	0	0	0	0	0
g__Flavihumibacter	0.000139587	0	0.000279174	0	0	0	0	0	0	0	0	0	0	0	0	0	0	0
g__Ahniella	0.000139587	0.00153546	0.00139587	0	0	0.000139587	0	0	0	0	0	0	0	0	0	0	0	0
g__mle1-7	0.000977108	0.000279174	0.0011167	0.000139587	0	0	0	0	0	0	0	0	0	0	0	0	0	0
g__Dokdonella	0	0	0	0	0.000139587	0.000139587	0	0	0	0.000139587	0	0.00237298	0	0	0	0	0	0
g__Pajaroellobacter	0.000977108	0.00139587	0.000139587	0.000558347	0.000837521	0.000558347	0.000139587	0	0.000279174	0.000697934	0	0	0.000139587	0.000279174	0.000279174	0.000279174	0.00362926	0
g__HdN1	0	0	0.000139587	0	0	0	0	0	0	0	0	0	0	0	0	0	0	0
g__Nocardioides	0.00348967	0.00293132	0.00237298	0.0100503	0.0219151	0.0122836	0.00725852	0.0134003	0.0101898	0.00628141	0.0203797	0.0073981	0.000558347	0.000837521	0.000977108	0.00223339	0.00446678	0.000139587
g__uncultured_compost_bacterium	0	0	0	0.000139587	0	0	0	0	0	0	0	0	0	0	0	0	0	0
g__uncultured_Flavobacterium_sp.	0	0	0	0	0	0	0	0	0	0	0	0	0	0	0	0	0	0.00195422
g__Hylemonella	0	0	0	0	0	0	0	0	0	0	0	0	0.00153546	0.000977108	0.000558347	0	0	0
g__Parafilimonas	0.000279174	0.000139587	0.000279174	0	0	0	0	0	0	0	0	0	0	0	0	0	0	0
g__Rhodobacter	0.00795645	0.0138191	0.00711893	0.000139587	0.000558347	0.000139587	0.000279174	0.0020938	0	0	0.000139587	0	0.000697934	0.00139587	0.000279174	0	0	0
g__uncultured_Planctomyces_sp.	0	0	0	0	0	0.000139587	0	0	0	0	0	0	0	0	0	0	0	0
g__DEV114	0.000279174	0	0.000139587	0	0	0	0	0	0	0	0	0	0	0	0	0	0	0
g__Aridibacter	0.000139587	0.00041876	0.0011167	0.000279174	0.000279174	0.000279174	0	0	0	0	0	0	0	0	0	0	0	0
g__Pseudenhygromyxa	0.000139587	0	0	0	0	0	0	0	0	0	0	0	0	0	0	0	0	0
g__Algoriphagus	0	0	0	0.00041876	0.000139587	0	0	0	0	0	0	0	0	0	0	0	0	0
g__Pir4_lineage	0.0032105	0.00335008	0.00181463	0.00460637	0.00223339	0.00307091	0	0	0	0	0	0	0	0	0	0	0	0
g__Kineococcus	0	0.000139587	0	0	0	0	0.00251256	0.00628141	0.00223339	0.00041876	0.000279174	0.00348967	0.000139587	0	0	0	0	0.000139587
g__UTCFX1	0	0.000977108	0.000697934	0	0.000139587	0	0	0	0	0	0	0	0	0	0	0	0	0
g__Malikia	0	0	0	0	0.000139587	0	0	0	0	0	0	0	0	0	0	0	0	0
g__uncultured_Mollicutes_bacterium	0.0094919	0.00390843	0.0032105	0.00642099	0.0127024	0.0328029	0	0	0	0	0	0	0	0	0	0	0	0
g__Crocinitomix	0.0011167	0.000837521	0.000279174	0	0	0	0	0	0	0	0	0	0	0	0	0	0	0
g__Luteitalea	0.000139587	0	0.000139587	0	0.000279174	0.000558347	0	0	0	0	0	0	0	0	0	0	0	0
g__Epulopiscium	0	0	0.000279174	0	0	0	0	0	0	0	0	0	0	0	0	0	0	0
g__Aliihoeflea	0.000139587	0	0	0.000279174	0.000139587	0.000697934	0	0	0	0	0	0	0	0	0	0	0	0
g__uncultured_sludge_bacterium_H8	0	0	0	0.000139587	0.000279174	0.000279174	0	0	0	0	0	0	0	0	0	0	0	0
g__Rhizocola	0	0.0011167	0	0.000139587	0	0	0	0	0	0	0	0	0	0	0	0	0	0
g__uncultured_Clostridiales_bacterium	0	0	0	0	0.000139587	0	0	0	0	0	0	0	0	0	0	0	0	0
g__Larkinella	0	0	0	0	0	0.000139587	0	0	0	0	0	0	0	0	0	0	0	0
g__Ornithinimicrobium	0	0	0	0	0	0	0	0	0	0.000139587	0.00474595	0.000279174	0	0	0	0	0	0
g__Thermobacillus	0	0	0.000139587	0.00041876	0.000139587	0	0	0	0	0	0	0	0	0	0	0	0	0
g__Longispora	0	0	0	0	0	0	0	0	0	0.000977108	0	0.000139587	0	0	0	0.000139587	0	0
g__Rheinheimera	0.000139587	0	0.000279174	0	0	0	0	0	0	0	0	0	0	0	0	0	0	0
g__Anaerospora	0.000139587	0	0	0	0	0	0	0	0	0	0	0	0	0	0	0	0	0
g__Abiotrophia	0	0	0	0	0	0	0	0	0	0.000139587	0	0.000558347	0	0	0	0	0	0
g__Pseudofulvimonas	0	0	0	0.000139587	0.000139587	0	0	0	0	0	0	0	0	0	0	0	0	0
g__Lechevalieria	0.00474595	0.0154941	0.0125628	0.0198213	0.0732831	0.00251256	0.00153546	0.00125628	0.0146566	0.0032105	0.00181463	0.00642099	0.000697934	0.00125628	0	0.00362926	0	0.000139587
g__Herpetosiphon	0.00041876	0.00474595	0.00041876	0.000139587	0.000837521	0.000558347	0	0	0	0	0	0	0	0	0	0	0	0
g__Oikopleura	0	0.00041876	0	0	0	0	0	0	0	0	0	0	0	0	0	0	0	0
g__Shinella	0.000279174	0.000558347	0	0.000279174	0	0.000279174	0	0	0	0	0	0	0	0	0	0	0	0
g__Porticoccus	0.000139587	0.000279174	0.000279174	0	0	0	0	0	0	0	0	0	0	0	0	0	0	0
g__Verrucomicrobium	0.0011167	0.000279174	0	0	0.000139587	0.000139587	0	0	0	0	0	0	0	0	0	0	0	0
g__Methylomonas	0.000139587	0	0	0	0	0	0	0	0	0	0	0	0	0	0	0	0	0
g__Neochlamydia	0	0	0	0	0	0	0	0	0	0	0.000977108	0	0	0	0	0	0	0
g__Roseisolibacter	0	0	0	0	0	0	0	0	0	0.00167504	0.00167504	0.00823562	0	0	0.000279174	0	0	0
g__Knoellia	0	0.000139587	0	0.00041876	0	0.00335008	0	0	0	0	0	0	0	0	0	0	0	0
g__FS140-16B-02_marine_group	0	0	0.000139587	0	0	0	0	0	0	0	0	0	0	0	0	0	0	0
g__Pseudactinotalea	0	0.000139587	0	0.000279174	0	0.000279174	0	0	0	0	0	0	0	0	0	0	0	0
g__Anaerosporomusa	0	0	0	0	0.000139587	0	0	0	0	0	0	0	0	0	0	0	0	0
g__Demequina	0	0.000139587	0.000139587	0.000558347	0.000139587	0.000139587	0	0	0	0	0	0	0	0	0	0	0	0
g__Vitreoscilla	0	0	0	0	0	0	0.000139587	0.000139587	0.00153546	0	0	0	0	0	0	0	0	0
g__Roseimarinus	0.000139587	0.000558347	0	0	0	0	0	0	0	0	0	0	0	0	0	0	0	0
g__Ideonella	0	0.000139587	0	0	0	0	0	0	0	0	0	0	0	0	0	0	0	0
g__Ellin517	0.00125628	0.000977108	0.000697934	0.000279174	0.00041876	0	0	0	0	0	0	0	0	0	0	0	0	0
g__Oscillochloris	0.000139587	0.000139587	0	0	0	0	0	0	0	0	0	0	0	0	0.000697934	0	0	0
g__Candidatus_Entotheonella	0.000279174	0.000139587	0	0	0	0	0	0	0	0	0	0	0	0	0	0	0	0
g__Pantoea	0.000139587	0	0.000139587	0.00335008	0.000279174	0	0.00041876	0.000279174	0	0.000139587	0	0	0	0.000139587	0.0011167	0	0.000279174	0
g__Actinorectispora	0.00279174	0.00683975	0.00656058	0	0.000139587	0	0	0	0	0	0	0	0	0	0	0	0	0
g__Lawsonella	0	0	0	0	0	0	0	0	0	0.00125628	0	0	0.00041876	0	0	0	0	0
g__Thalassobaculum	0	0	0	0	0.000139587	0	0	0	0	0	0	0	0	0	0	0	0	0
g__Thiocapsa	0.000139587	0.000139587	0	0	0	0.000139587	0	0	0	0	0	0	0	0	0	0	0	0
g__SM1A02	0.00335008	0.00586265	0.00558347	0.0101898	0.0100503	0.00446678	0	0	0	0	0	0	0	0	0	0	0	0
g__Desulfosporosinus	0	0	0.000139587	0.000697934	0.000558347	0	0	0	0	0	0	0	0	0	0	0	0	0
g__Microlunatus	0.00041876	0	0.000139587	0.000139587	0.000279174	0.000279174	0	0	0	0	0	0	0	0	0	0	0	0
g__Diaphorobacter	0.000139587	0	0	0	0	0	0	0	0	0	0	0	0	0	0	0	0	0
g__Escherichia-Shigella	0	0	0	0	0	0	0.000697934	0.000697934	0.000139587	0	0.000837521	0.00195422	0.000139587	0	0.000139587	0.00544389	0.000139587	0.000279174
g__Aquabacterium	0	0	0	0	0.000139587	0	0.00572306	0.000139587	0.0011167	0.00181463	0.000697934	0	0.0228922	0.0350363	0.05067	0	0	0.000139587
g__Phytohabitans	0.000139587	0.000139587	0.000139587	0	0	0	0	0	0	0	0	0	0	0	0	0	0	0
g__Mesorhizobium	0.00362926	0.00167504	0.00251256	0.00348967	0.00614182	0.00991066	0	0.00460637	0.00502513	0	0	0.0041876	0.000558347	0	0.00041876	0	0.000139587	0
g__Uliginosibacterium	0.000279174	0.000139587	0	0	0	0.000279174	0	0	0	0	0	0	0	0	0	0	0	0
g__Arenibacter	0	0	0	0.000139587	0	0	0	0	0	0	0	0	0	0	0	0	0	0
g__AKYG587	0.000837521	0.000558347	0.00167504	0.000139587	0.000139587	0	0	0	0	0	0	0	0	0	0	0	0	0
g__uncultured_Acidobacteriales_bacterium	0.000558347	0.000139587	0.000279174	0.000139587	0.000139587	0	0	0	0	0	0	0	0	0	0	0	0	0
g__Chloronema	0.000139587	0.000139587	0	0	0	0	0	0	0	0	0	0	0	0	0	0	0	0
g__Exiguobacterium	0	0.000139587	0	0	0	0	0.00195422	0	0	0	0.000139587	0	0.0041876	0	0	0	0	0
g__uncultured_sludge_bacterium	0	0	0	0.000139587	0	0	0	0	0	0	0	0	0	0	0	0	0	0
g__Serratia	0.00041876	0.000279174	0.000139587	0.000558347	0.000139587	0.0138191	0.00670017	0.0305695	0.012842	0.000279174	0.00041876	0.000139587	0.00181463	0.00390843	0.0864042	0	0.00335008	0.000837521
g__Acidovorax	0.0307091	0.00977108	0.0118649	0.00139587	0.00474595	0.0131212	0.00153546	0.00600223	0.00697934	0.000697934	0.00195422	0.00446678	0.0041876	0.0143774	0.00544389	0.000139587	0.00195422	0.00125628
g__Sulfurifustis	0.000139587	0.000139587	0.000139587	0.000139587	0	0	0	0	0	0	0	0	0	0	0	0	0	0
g__UCG-005	0	0	0	0	0	0	0	0	0	0	0	0	0	0	0	0	0	0.000558347
g__Candidatus_Accumulibacter	0	0.000279174	0	0	0	0	0	0	0	0	0	0	0	0	0.000279174	0	0	0
g__Brevifollis	0	0.000139587	0.000139587	0	0	0	0	0	0	0	0	0	0	0	0	0	0	0
g__Chryseomicrobium	0	0	0	0.000279174	0.000139587	0	0	0	0	0	0	0	0	0	0	0	0	0
g__Chthonobacter	0.000279174	0.000139587	0.00041876	0	0	0	0	0	0	0	0	0	0	0	0	0	0	0
g__Jeotgalibacillus	0	0	0	0.000139587	0.000279174	0.000139587	0	0	0	0	0	0	0	0	0	0	0	0
g__KD3-10	0	0.000279174	0.000139587	0	0	0	0	0	0	0	0	0	0	0	0	0	0	0
g__Actinoplanes	0.00725852	0.0157733	0.00753769	0.0189838	0.00865438	0.0569514	0.000279174	0.000279174	0.00572306	0.000139587	0.00348967	0.00041876	0	0.000697934	0.000279174	0	0	0.000139587
g__Lactonifactor	0	0	0	0.000139587	0	0	0	0	0	0	0	0	0	0	0	0	0	0
g__OM60_NOR5_clade	0	0	0	0	0.000139587	0	0	0	0	0	0	0	0	0	0	0	0	0
g__Xanthomonas	0	0	0	0	0	0	0.0101898	0.0011167	0.00153546	0.00041876	0.000837521	0.00139587	0.00376884	0.00167504	0.0212172	0.00265215	0.101898	0.00823562
g__Duganella	0.00041876	0.000558347	0.000279174	0.000279174	0	0.000139587	0	0.000837521	0.000139587	0.000279174	0	0.00041876	0.000279174	0	0.00139587	0.0259631	0.0011167	0.00767727
g__Piscinibacter	0.000279174	0.00041876	0.000279174	0	0	0	0	0	0	0	0	0	0	0	0	0	0	0
g__Desulfitibacter	0	0	0	0	0.000139587	0	0	0	0	0	0	0	0	0	0	0	0	0
g__Candidatus_Berkiella	0.000977108	0.00237298	0.000977108	0	0.000697934	0	0.000279174	0	0.00153546	0	0	0	0	0	0	0	0	0
g__Streptococcus	0	0	0	0	0	0	0.000139587	0.000139587	0.00167504	0.000837521	0.00362926	0.00656058	0	0	0	0.000139587	0.00153546	0.000837521
g__Kosakonia	0.000558347	0.00041876	0.000139587	0.000558347	0.000279174	0.000558347	0.00725852	0.00195422	0.00516471	0.000697934	0	0.000697934	0.0309883	0.0198213	0.00767727	0.0573702	0.000279174	0.00223339
g__Actinomycetospora	0	0	0	0	0	0	0	0	0	0.000279174	0	0	0	0	0.000139587	0.00390843	0	0
g__Luteolibacter	0.0110274	0.00404802	0.00781686	0.00488554	0.00725852	0.0127024	0	0	0	0	0	0	0	0	0	0	0	0
g__Flexibacter	0.000697934	0.000279174	0	0	0	0	0	0	0	0	0	0	0	0.00041876	0.00153546	0	0	0
g__Amaricoccus	0.000837521	0.000279174	0.00041876	0	0.000279174	0	0	0	0	0	0	0	0	0	0	0	0	0
g__Salirhabdus	0	0	0	0.000139587	0	0	0	0	0	0	0	0	0	0	0	0	0	0
g__Litorilinea	0	0.000139587	0.000279174	0	0	0	0	0	0	0	0	0	0	0	0	0	0	0
g__Comamonas	0.0117253	0.00753769	0.0100503	0.000279174	0.000139587	0.000139587	0.000279174	0.000279174	0.000139587	0.000139587	0.000139587	0.00390843	0.00125628	0.000279174	0.00139587	0	0	0.000139587
g__Milano-WF1B-03	0.000139587	0	0	0	0	0	0	0	0	0	0	0	0	0	0	0	0	0
g__Pelagibacterium	0	0	0	0.00041876	0	0	0	0.000279174	0	0.00139587	0.00991066	0.000837521	0	0	0	0	0.000139587	0
g__Salinispira	0.000837521	0.000139587	0	0	0	0	0.00237298	0	0	0	0	0	0.000837521	0	0	0	0	0
g__Advenella	0	0	0	0	0	0	0	0	0	0.000279174	0.00237298	0.00041876	0	0	0	0	0	0
g__Chryseolinea	0	0.00125628	0.00041876	0.0020938	0.000697934	0.000139587	0	0	0	0	0	0	0.00153546	0.000139587	0.00041876	0	0	0
g__Sediminibacterium	0.000139587	0.000697934	0.000139587	0	0	0	0	0	0.000837521	0.000139587	0	0	0	0	0	0	0	0
g__Caedibacter	0.000139587	0	0	0.000139587	0.000279174	0	0	0	0	0	0	0	0	0	0	0	0	0
g__Polynucleobacter	0	0	0	0	0	0.000139587	0	0	0	0	0	0	0	0	0	0	0	0
g__Carnimonas	0	0	0	0	0	0	0	0	0.000697934	0.00041876	0	0.00167504	0	0	0.00041876	0	0	0
g__Puia	0	0	0.000139587	0	0	0	0.000837521	0	0	0	0	0	0	0.00041876	0	0	0	0
g__Rubritepida	0	0	0	0	0	0	0	0	0	0.000279174	0.000139587	0.00390843	0	0	0	0	0	0
g__LD29	0	0	0.000139587	0.000279174	0.000139587	0	0	0	0	0	0	0	0	0	0	0	0	0
g__Nitrospira	0.00307091	0.000837521	0.00474595	0.000697934	0.000139587	0.00041876	0.00167504	0.000697934	0.00125628	0	0	0	0	0	0	0	0	0.000139587
g__Subgroup_10	0.00279174	0.00488554	0.00586265	0.00376884	0.0032105	0.00139587	0	0	0.000697934	0	0	0	0	0.000139587	0	0	0	0
g__Candidatus_Udaeobacter	0.00125628	0.00181463	0.00181463	0	0	0	0	0	0	0	0	0	0	0	0	0	0	0
g__Fictibacillus	0.00041876	0	0.000697934	0	0.000279174	0	0	0	0	0	0	0	0	0	0	0	0	0
g__Gemmatimonas	0.000697934	0	0.000139587	0.000558347	0.000558347	0.000558347	0	0	0	0.00041876	0	0.00460637	0	0	0	0	0	0
g__Tumebacillus	0.00279174	0.000837521	0.00139587	0.00125628	0.00041876	0.000139587	0.00558347	0.0443886	0.000558347	0.000139587	0.00125628	0	0	0	0	0	0.000279174	0
g__Bosea	0.000558347	0.000279174	0.000558347	0.00153546	0.00307091	0.00600223	0.00181463	0.00223339	0.00446678	0.00223339	0.0032105	0.00446678	0.0115857	0.0134003	0.00586265	0.000837521	0.0305695	0
g__Clostridium_sensu_stricto_11	0	0.000139587	0	0	0	0	0	0	0	0	0	0	0	0	0	0	0	0
g__Candidatus_Amoebophilus	0.000139587	0	0.000139587	0	0	0	0	0	0	0	0	0	0	0	0	0	0	0
g__Azohydromonas	0.000139587	0.00041876	0.000139587	0	0	0	0	0	0	0	0	0	0	0	0	0	0	0
g__Geobacillus	0	0	0	0	0.000139587	0	0	0	0	0	0	0	0	0	0	0	0	0
g__Plot4-2H12	0	0	0	0	0	0	0.00167504	0.00139587	0	0	0	0	0.00125628	0.00139587	0.00181463	0	0	0
g__uncultured_eubacterium_WD2107	0	0	0	0	0	0	0.00041876	0.00041876	0.00293132	0.000279174	0	0	0.00767727	0.00279174	0.0011167	0	0	0
g__DSSD61	0.000558347	0.000558347	0.000139587	0	0	0	0	0	0	0	0	0	0	0	0.000279174	0	0	0
g__Planctopirus	0.000977108	0.00223339	0.000837521	0	0.000139587	0.00041876	0	0	0	0	0	0	0	0	0	0	0	0
g__Klenkia	0	0	0	0	0	0	0.000697934	0	0	0.000139587	0	0	0.0011167	0.00125628	0.000697934	0	0	0
g__Aquicella	0.00223339	0.00767727	0.00279174	0.00237298	0.00125628	0.00837521	0.00488554	0.00376884	0.00586265	0.000558347	0.0041876	0.00697934	0	0.00041876	0	0	0	0
g__Methylorosula	0	0	0	0	0	0	0	0	0	0.000139587	0.000139587	0.00237298	0	0	0	0	0	0
g__Moheibacter	0	0	0	0	0.000139587	0	0.000139587	0.000977108	0	0	0	0	0	0	0	0	0	0
g__Herminiimonas	0	0	0	0	0	0	0.000279174	0	0	0.000279174	0.00488554	0.000279174	0	0	0	0	0	0
g__uncultured_Planctomycetales_bacterium	0	0	0	0	0	0.000139587	0	0	0	0	0	0	0	0	0	0	0	0
g__CL500-3	0.000279174	0.000139587	0.00041876	0	0	0	0	0	0	0	0	0	0	0	0	0	0	0
g__Candidatus_Protochlamydia	0	0	0	0	0	0	0	0	0	0	0.000279174	0	0	0	0	0	0	0
g__UTBCD1	0	0	0.000139587	0	0	0	0	0	0	0	0	0	0	0	0	0	0	0
g__Thiofractor	0	0.000139587	0.000837521	0	0	0	0	0	0	0	0	0	0	0	0	0	0	0
g__Pirellula	0.000697934	0.000977108	0.00167504	0.00041876	0.000279174	0.000837521	0	0	0	0	0	0	0	0	0	0	0	0
g__Luteibacter	0	0	0	0	0	0	0	0	0	0.000558347	0.00335008	0	0	0	0	0.000139587	0.00432719	0.00865438
g__Streptosporangium	0	0	0	0	0	0	0	0	0.000139587	0	0.000139587	0.00195422	0	0	0	0	0	0
g__Azonexus	0.000139587	0.0011167	0.00139587	0	0	0	0	0	0	0	0	0	0	0	0	0	0	0
g__Tepidimonas	0	0	0	0	0	0	0	0.000139587	0	0.000139587	0.000139587	0.00600223	0	0.000139587	0	0	0.000139587	0
g__Methylibium	0	0	0	0	0	0	0.00697934	0.0101898	0.00753769	0.00125628	0	0.000279174	0.0858459	0.0896147	0.116276	0.000837521	0.000139587	0.000558347
g__Emticicia	0.00293132	0.000697934	0.000279174	0.00041876	0.000139587	0.000139587	0	0	0	0	0	0	0	0	0	0	0	0
g__Propionicicella	0.000139587	0	0	0.000279174	0	0	0	0	0	0	0	0	0	0	0	0	0	0
g__Verrucomicrobia_bacterium_LX191	0.000139587	0	0	0.000279174	0.000279174	0.000139587	0	0	0	0	0	0	0	0	0	0	0	0
g__Ancylobacter	0	0	0	0.000279174	0	0.000139587	0	0	0.000139587	0	0	0	0.000139587	0.000139587	0.000837521	0.00237298	0	0.000837521
g__Arsenicitalea	0	0.000139587	0.000139587	0.000558347	0.00041876	0.000977108	0	0	0	0	0	0	0	0	0	0	0	0
g__uncultured_Acidimicrobiia_bacterium	0	0	0	0	0	0	0	0	0	0.000977108	0	0.000279174	0	0	0	0	0	0
g__Blastopirellula	0.000279174	0.000139587	0.00041876	0	0	0	0	0	0	0	0	0	0	0	0	0	0	0
g__Verruc-01	0	0	0	0.00041876	0.000139587	0	0	0	0	0	0	0	0	0	0	0	0	0
g__Sorangium	0.00125628	0.000697934	0.00809604	0.000139587	0.00041876	0.000279174	0.0011167	0.000139587	0	0.000279174	0	0.000837521	0.00907314	0.00223339	0.000279174	0	0	0
g__Caulobacter	0.0020938	0.00195422	0.000558347	0.00041876	0.000558347	0.00251256	0.0122836	0.00572306	0.00195422	0.00711893	0.0203797	0.00502513	0.00893356	0.00293132	0.00544389	0.00977108	0	0.00167504
g__Flavitalea	0.000279174	0	0.000279174	0.00181463	0	0.00139587	0	0	0	0	0	0	0	0	0	0	0	0
g__ADurb.Bin063-1	0	0.000139587	0	0	0	0	0	0	0	0	0	0	0	0	0	0	0	0
g__Nocardia	0	0	0.000139587	0	0	0	0.000279174	0.00251256	0.000139587	0.0011167	0	0	0	0.000279174	0	0	0	0
g__Catellatospora	0	0.000139587	0.000279174	0.000139587	0	0.000279174	0	0	0	0	0	0	0	0	0	0	0	0
g__Abditibacterium	0	0.000279174	0	0.00041876	0.00041876	0.00251256	0	0	0	0.000139587	0	0.0115857	0	0	0	0.000139587	0.000139587	0.00223339
g__Xylophilus	0.0041876	0.00153546	0.0020938	0.00572306	0.00963149	0.0258236	0	0	0	0	0	0	0	0	0	0	0	0
g__uncultured_organism	0.000697934	0.000697934	0.000279174	0.00041876	0.000697934	0	0	0.000139587	0	0.000139587	0.00544389	0.000139587	0	0	0	0	0	0
g__Pseudoflavitalea	0.00181463	0.00223339	0.000558347	0.000558347	0.000558347	0.000697934	0	0	0.000279174	0	0	0	0.000558347	0	0	0	0	0
g__Segniliparus	0	0	0	0	0	0	0.00139587	0.00767727	0.00642099	0	0.00041876	0.00041876	0.00628141	0.0146566	0.028057	0.000279174	0.00614182	0.000697934
g__alpha_proteobacterium_OR-84	0	0	0	0	0	0	0.00362926	0	0	0	0	0	0.000139587	0.000697934	0.000697934	0	0	0.000139587
g__Patulibacter	0	0	0	0.000279174	0	0	0	0	0	0.00041876	0	0.000279174	0	0	0.000279174	0.000139587	0.00865438	0.00600223
g__Schumannella	0	0	0	0	0.000279174	0.000139587	0	0	0	0	0	0	0	0	0	0	0	0
g__Pricia	0	0	0	0.000558347	0	0	0	0	0	0	0	0	0	0	0	0	0	0
g__Sphingorhabdus	0.000139587	0	0.000139587	0	0	0	0	0	0	0	0	0	0	0	0	0	0	0
g__Amphiplicatus	0	0	0	0.00041876	0	0	0	0	0	0	0	0	0	0	0	0	0	0
g__Roseomonas	0.000139587	0	0	0.000139587	0	0	0.000139587	0.0011167	0.000837521	0	0	0.0011167	0.000977108	0	0.000977108	0.00697934	0.000279174	0
g__Micromonospora	0.000139587	0.000279174	0.000139587	0	0.000139587	0.000558347	0.0011167	0.00181463	0.0153546	0.000697934	0.00153546	0.00139587	0.000139587	0	0	0	0	0.000139587
g__Rudaeicoccus_suwonensis	0	0	0	0	0	0	0	0	0	0	0	0	0	0	0	0	0	0.000837521
g__Thermincola	0	0	0	0.000139587	0	0	0	0	0	0	0	0	0	0	0	0	0	0
g__Craurococcus-Caldovatus	0	0	0	0	0	0	0.000139587	0	0	0.00181463	0	0.000139587	0	0	0	0	0	0
g__Permianibacter	0.00935232	0.0127024	0.0170296	0	0.000279174	0	0	0	0	0	0	0	0	0	0	0	0	0
g__Paenisporosarcina	0.000139587	0.000139587	0	0.00237298	0.0011167	0.000139587	0	0	0	0	0	0	0	0	0	0	0	0
g__uncultured_actinobacterium	0.0011167	0.000279174	0.000139587	0.00195422	0.000697934	0.00041876	0	0	0	0	0	0	0	0	0	0	0	0
g__Nordella	0.000697934	0.000837521	0.000977108	0.000977108	0.00041876	0.000977108	0.000279174	0	0.000977108	0.0020938	0	0	0	0	0	0	0	0
g__Clostridium_sensu_stricto_13	0.000279174	0	0.00041876	0	0	0	0	0.0011167	0	0	0	0	0	0	0	0	0	0
g__Solirubrobacter	0.00139587	0.000837521	0.000697934	0.00181463	0.0011167	0.000977108	0	0	0.000558347	0.000977108	0.000977108	0.00432719	0	0	0	0	0	0
g__Enhydrobacter	0	0	0	0	0	0	0	0	0	0.000139587	0.000279174	0.000279174	0	0	0	0.000697934	0.00125628	0
g__Empedobacter	0	0	0	0	0	0	0.000697934	0	0.00167504	0.000139587	0	0	0	0	0	0	0	0
g__Defluviimonas	0	0	0	0.00041876	0	0	0	0	0	0	0	0	0	0	0	0	0	0
g__Sphaerotilus	0	0.000139587	0.000139587	0	0	0	0	0	0	0.00041876	0	0	0.0100503	0.000837521	0.0114461	0	0	0.000139587
g__Virgibacillus	0	0	0	0.000558347	0	0.000837521	0	0	0	0	0	0	0	0	0	0	0	0
g__Gluconobacter	0	0	0	0	0	0	0	0	0.00041876	0	0	0	0	0	0.00041876	0	0	0
g__Phoenix_dactyliferadate_palm	0	0	0	0	0	0	0.00181463	0.00041876	0	0.00041876	0	0	0.0011167	0.00041876	0.0011167	0.0118649	0.00237298	0.00279174
g__Chitinophaga	0.00041876	0.000279174	0.000139587	0.00697934	0.000558347	0.00823562	0	0	0	0	0	0	0.000697934	0	0.000139587	0.00041876	0.00041876	0
g__Chthoniobacter	0.00293132	0.00404802	0.00293132	0.00041876	0.00125628	0.00223339	0	0	0	0	0	0	0	0	0	0	0	0
g__Sinibacillus	0	0	0	0	0.000279174	0.000139587	0	0	0	0	0	0	0	0	0	0	0	0
g__Microbacterium	0.00335008	0.00153546	0.00265215	0.0205193	0.0254048	0.012842	0.00181463	0.00488554	0.000977108	0.00265215	0.00404802	0.00390843	0.0011167	0.000279174	0.000279174	0.00279174	0.0041876	0
g__OLB15	0.000139587	0.00041876	0.000558347	0	0.000139587	0	0	0	0	0	0	0	0	0	0	0	0	0
g__Ruminococcus_torques_group	0	0	0	0	0	0	0.000139587	0.00125628	0	0	0	0	0	0	0	0	0	0
g__Haliangium	0.0118649	0.0139587	0.0125628	0.0205193	0.0180067	0.00460637	0.000139587	0.000558347	0.000139587	0.00041876	0.00279174	0.000139587	0.000977108	0.000139587	0.00041876	0	0	0
g__Spirochaeta_2	0	0.000139587	0.000279174	0	0	0	0	0	0	0	0	0	0	0	0	0	0	0
g__Rothia	0	0	0	0	0	0	0.000558347	0.00181463	0	0.000279174	0.000697934	0.000558347	0	0	0	0.000139587	0.00153546	0.000139587
g__Herbidospora	0	0	0	0	0	0	0.00195422	0.000697934	0.0389447	0	0.000279174	0.0032105	0	0	0	0	0	0.000279174
g__Opitutus	0.00767727	0.00558347	0.00474595	0.00265215	0.00223339	0.00502513	0	0	0	0	0	0	0	0	0	0	0	0
g__Niveitalea	0.000139587	0	0	0	0	0	0	0	0	0	0	0	0	0	0	0	0	0
g__Geobacter	0.000139587	0.00139587	0.000837521	0.000139587	0	0	0	0	0	0	0	0	0	0	0	0	0	0
g__Rhodococcus	0.000139587	0	0.000279174	0.000697934	0	0.000139587	0.00683975	0.0113065	0.0124232	0.00516471	0.0251256	0.0173088	0.010469	0.00279174	0.00809604	0.0142379	0.0865438	0.00614182
g__Paraclostridium	0	0	0.000139587	0	0.000279174	0	0	0	0	0	0	0	0	0	0	0	0	0
g__Methylotenera	0	0	0	0.00041876	0	0	0.000139587	0.00223339	0	0.000139587	0.000837521	0	0	0	0	0	0	0
g__Clostridium_sensu_stricto_8	0.000139587	0	0.00041876	0	0	0	0	0	0	0	0	0	0	0	0	0	0	0
g__Lysinibacillus	0.000139587	0.000139587	0.00041876	0.00725852	0.00558347	0.000139587	0.00223339	0	0.00223339	0.000139587	0	0.00139587	0	0	0	0	0	0.000139587
g__Adhaeribacter	0.000139587	0	0.000139587	0	0	0	0	0.0011167	0	0	0.000279174	0	0	0	0	0	0	0
g__Baia	0.000139587	0	0	0.000279174	0	0	0	0.00153546	0	0	0	0	0	0	0	0	0	0
g__DEV008	0.000697934	0.000558347	0.000697934	0	0.000279174	0	0	0	0	0	0	0	0	0	0	0	0	0
g__Solitalea	0	0.000279174	0	0	0	0	0	0	0	0	0	0	0	0.00041876	0	0	0	0
g__Altererythrobacter	0.000977108	0.000558347	0.00139587	0.00362926	0.00195422	0.00460637	0.0108878	0.00362926	0.00139587	0.00935232	0.0241485	0.00488554	0.00181463	0.00153546	0.00125628	0.0094919	0.00139587	0.00041876
g__JGI_0001001-H03	0.000977108	0.000558347	0.000558347	0.0011167	0.000837521	0.000279174	0	0	0	0	0	0	0	0	0	0	0	0
g__Brochothrix	0	0	0	0	0	0	0	0	0.0011167	0	0	0	0	0	0	0	0	0
g__Kaistia	0	0	0	0	0.000139587	0	0.000139587	0.00502513	0	0.00195422	0.000139587	0.00237298	0	0.000279174	0.000139587	0.000139587	0.00237298	0.00139587
g__Pedobacter	0.000139587	0	0.000139587	0.000697934	0	0.00125628	0.00362926	0.00991066	0.000139587	0.00474595	0.00307091	0.0108878	0.00265215	0.0020938	0.00265215	0.0143774	0.0683975	0.0344779
g__Rhodoplanes	0.000697934	0.00223339	0.00167504	0.0041876	0.00335008	0.00335008	0	0	0.00181463	0	0.000837521	0.000139587	0.000279174	0	0.000279174	0	0	0
g__Enterobacter	0.000139587	0	0	0	0	0.000279174	0	0	0	0	0	0	0	0	0	0	0	0
g__Aquaspirillum_arcticum_group	0	0	0	0	0	0.00041876	0	0	0	0	0	0	0	0	0	0	0	0
g__Lysinimonas	0.000139587	0.000139587	0.000139587	0.00558347	0.00167504	0.00628141	0	0	0	0	0	0	0	0	0	0	0	0
g__Pigmentiphaga	0	0	0	0	0	0	0	0	0	0	0	0	0	0	0.000279174	0	0	0
g__Rhodopirellula	0	0	0	0.000139587	0	0.000279174	0	0	0	0	0	0	0	0	0	0	0	0
g__Cohnella	0.000139587	0.000279174	0.000279174	0.00488554	0.00376884	0.00600223	0.00181463	0.00195422	0.000279174	0.000279174	0.000139587	0.00125628	0	0	0	0	0	0
g__BIyi10	0	0	0.000279174	0.00195422	0.0020938	0.000977108	0	0	0	0	0	0	0	0	0	0	0	0
g__Herbaspirillum	0.000139587	0	0	0	0	0	0	0.000139587	0.0020938	0.000139587	0	0	0.00628141	0.000837521	0.00697934	0	0	0.000139587
g__Glycomyces	0.000139587	0	0	0.00181463	0.00348967	0.000139587	0	0	0	0	0	0	0	0	0	0	0	0
g__Lacibacter	0.000837521	0	0.000139587	0	0	0	0	0	0	0	0	0	0	0	0	0	0	0
g__Naasia	0.000279174	0.000139587	0	0	0.000139587	0.00041876	0	0	0	0	0	0	0	0	0	0	0	0
g__Stenotrophomonas	0.00293132	0.000139587	0.000139587	0.000977108	0.00432719	0.000977108	0.053043	0.139308	0.154104	0.00153546	0.00502513	0.00502513	0.0743998	0.10804	0.0604411	0.0094919	0.00488554	0.00656058
g__Marinilutecoccus	0	0	0	0	0	0	0	0	0	0	0	0.00167504	0	0	0	0	0	0
g__Asticcacaulis	0.00293132	0.000558347	0.00139587	0	0.000279174	0.000837521	0.000697934	0.00586265	0	0	0	0	0.0020938	0.00041876	0.000977108	0	0	0
g__Terrimicrobium	0	0.000139587	0.000139587	0.00195422	0.00181463	0.00376884	0	0	0	0	0	0	0	0	0	0	0	0
g__uncultured_Clostridium_sp.	0	0	0	0	0.000139587	0	0	0	0	0	0	0	0	0	0	0	0	0
g__uncultured_Nitrosomonadaceae_bacterium	0.00139587	0.0011167	0.00139587	0	0	0	0	0	0.00041876	0.000139587	0	0	0	0	0	0	0	0
g__Pseudomonas	0.00293132	0.00041876	0.00265215	0.00837521	0.0206588	0.00390843	0.0221943	0.0219151	0.0173088	0.00390843	0.00279174	0.00670017	0.0688163	0.185232	0.0510888	0.104132	0.123116	0.0584869
g__Cupriavidus	0	0	0	0	0	0	0	0	0.0011167	0	0	0	0	0	0	0	0	0
g__Myxococcus	0.000139587	0.000139587	0.000279174	0.000139587	0.000139587	0.000139587	0	0	0	0.00041876	0	0.00041876	0	0	0.000139587	0	0	0.00041876
g__Ammoniphilus	0.000139587	0.000139587	0	0	0	0	0	0	0	0	0	0	0	0	0	0	0	0
g__Staphylococcus	0	0	0	0.000139587	0	0	0.0210776	0.00977108	0.0149358	0.00041876	0.00335008	0.00181463	0.0011167	0.00125628	0.00125628	0	0.000139587	0.0011167
g__Pseudoxanthomonas	0.000139587	0.000558347	0	0.00460637	0.00502513	0.0189838	0.00125628	0.00335008	0	0.000139587	0.000139587	0.00153546	0.0115857	0.00237298	0.0011167	0.000139587	0	0
g__Longimicrobium	0	0	0	0	0	0	0.000279174	0.00181463	0.000139587	0	0	0.00125628	0	0.000139587	0	0	0	0
g__Candidatus_Omnitrophus	0.000279174	0.000279174	0.000279174	0	0	0	0	0	0	0	0	0	0	0	0	0	0	0
g__Candidatus_Cardinium	0	0	0	0	0	0	0	0	0	0	0	0	0	0	0.000697934	0	0	0
g__Actinocorallia	0.00041876	0	0.000139587	0.00348967	0.000977108	0.00153546	0	0	0	0	0	0	0	0	0	0	0	0
g__Sulfurovum	0.00041876	0	0	0	0	0	0	0	0	0	0	0	0	0	0	0	0	0
g__uncultured_Bacteroidetes_bacterium	0.000139587	0.00041876	0.000279174	0	0.000139587	0	0	0	0	0	0	0	0	0	0	0	0	0
g__uncultured_sludge_bacterium_S14	0	0	0	0.000279174	0	0	0	0	0	0	0	0	0	0	0	0	0	0
g__Nitrosomonas	0	0	0	0.000139587	0	0	0	0	0	0.000558347	0	0.00181463	0	0	0	0	0	0
g__Acidothermus	0	0	0	0	0	0	0.000139587	0.00125628	0	0	0	0	0	0	0.000139587	0	0	0
g__Silvanigrella	0.00041876	0.000139587	0.000697934	0.000139587	0	0	0	0	0	0	0	0	0	0.000558347	0	0	0	0
g__Roseateles	0	0	0	0	0	0	0.000139587	0	0.000977108	0	0	0	0.00041876	0.0020938	0.00446678	0	0	0.000139587
g__Tabrizicola	0	0	0	0	0	0	0.000558347	0.00293132	0.00683975	0.00041876	0	0.000279174	0.00181463	0.00041876	0.000279174	0	0	0
g__metagenome	0.0159129	0.0283361	0.0166108	0.0143774	0.0114461	0.0131212	0.00432719	0.00279174	0.00195422	0.000139587	0.00125628	0.00223339	0.00404802	0.000697934	0.000697934	0	0	0
g__Xanthobacter	0	0	0	0	0	0	0	0.000139587	0.0011167	0	0	0	0	0.00251256	0.000837521	0	0	0
g__Nakamurella	0.000139587	0	0.00041876	0.000139587	0.000139587	0	0.000139587	0.00195422	0	0.000139587	0	0.00041876	0	0	0	0	0	0
g__Anaerosolibacter	0	0	0	0.000139587	0	0	0	0	0	0	0	0	0	0	0	0	0	0
g__Lacunisphaera	0.00781686	0.0085148	0.00348967	0.0011167	0.00223339	0	0	0	0	0	0	0	0	0	0	0	0	0
g__Ochrobactrum	0	0	0	0.000139587	0	0	0.00279174	0	0	0.000837521	0.000139587	0	0.0011167	0	0.000139587	0.000279174	0.0111669	0
g__Phaselicystis	0	0.000558347	0.00041876	0.000279174	0.00041876	0	0	0	0	0	0	0	0	0	0	0	0	0
g__Phreatobacter	0.000279174	0.000139587	0	0.000697934	0.00139587	0.000279174	0.00265215	0.00251256	0.000139587	0	0	0	0.00181463	0	0.000139587	0	0.0020938	0
g__Bauldia	0.00041876	0.00041876	0.000837521	0.000837521	0.000697934	0.00041876	0.000139587	0.00279174	0	0.000977108	0.00460637	0.000279174	0	0	0	0	0	0.00167504
g__Cerasibacillus	0	0	0	0	0	0	0	0.00041876	0	0	0.00544389	0	0	0	0	0	0.000139587	0
g__Defluviicoccus	0.000139587	0	0.000279174	0	0	0	0.000139587	0	0.000139587	0	0	0	0	0	0	0	0	0
g__Hoeflea	0	0	0	0	0	0	0	0.000279174	0.00265215	0.000279174	0.000139587	0.00488554	0	0	0.000139587	0.000139587	0.00600223	0
g__Cystobacter	0.00167504	0.0011167	0.000977108	0	0.000279174	0	0	0	0	0	0	0	0	0	0	0	0	0
g__Blastococcus	0.00041876	0.000139587	0	0	0	0.000139587	0.00460637	0.00139587	0.0053043	0.00237298	0.0129816	0.00348967	0	0.000279174	0	0.00600223	0	0
g__Anaeromyxobacter	0	0	0	0.000139587	0	0	0	0	0	0	0	0	0	0	0	0	0	0
g__Methylophilus	0	0	0.000139587	0	0	0	0	0	0	0	0	0	0	0	0	0	0	0
g__Stenotrophobacter	0.000977108	0.000279174	0.000139587	0	0.000279174	0	0	0	0	0	0	0	0	0	0	0	0	0
g__Dietzia	0	0	0	0	0	0	0.0020938	0.000139587	0.00293132	0.00139587	0.0032105	0.00586265	0	0	0.000139587	0.000139587	0.0020938	0
g__Cellulomonas	0	0	0	0	0	0	0.000279174	0.00167504	0	0.000697934	0.000279174	0.00404802	0	0	0	0	0	0
g__Chitinivorax	0	0.000139587	0	0	0	0	0	0	0	0	0	0	0	0	0	0	0	0
g__Candidatus_Solibacter	0.00153546	0.000837521	0.00041876	0	0	0.00041876	0	0	0	0	0	0	0	0.000279174	0	0	0	0
g__uncultured_Denitratisoma_sp.	0	0.0011167	0.000977108	0	0	0	0	0	0	0	0	0	0	0	0	0	0	0
g__Ferruginibacter	0.000558347	0.00167504	0.00362926	0.00446678	0.00153546	0.000977108	0.000837521	0.00041876	0	0.000139587	0	0	0	0	0.000139587	0	0	0
g__Cedecea	0	0	0	0	0	0	0	0	0.000139587	0	0.000139587	0	0	0.00725852	0.000837521	0.000279174	0	0.000697934
g__Bdellovibrio	0.00376884	0.00502513	0.00195422	0.00125628	0.00125628	0.00279174	0.00558347	0.000139587	0.000977108	0.00237298	0.00041876	0	0.00795645	0.000837521	0.000977108	0	0.000558347	0
g__Roseimicrobium	0.000558347	0.000697934	0.000279174	0.000558347	0.000697934	0.000558347	0	0	0	0	0	0	0	0	0	0	0	0
g__Euzebya	0	0	0	0	0	0.000139587	0	0	0	0	0	0	0	0	0	0	0	0
g__Blastocatella	0	0	0.000139587	0.00251256	0.000139587	0	0	0	0	0	0	0	0	0	0	0	0	0
g__Sporocytophaga	0.000139587	0.000279174	0.000139587	0	0	0	0	0	0	0	0	0	0	0	0	0	0	0
g__Prevotella	0	0	0	0	0	0	0.000139587	0.00125628	0.000139587	0.00139587	0	0.00041876	0	0	0	0	0.00041876	0
g__Aetherobacter	0	0	0	0.00167504	0	0.000139587	0	0	0	0	0.000139587	0	0	0	0.000139587	0	0.000837521	0.00139587
g__Gordonia	0.000139587	0	0.000139587	0	0	0	0	0	0	0.00041876	0.00502513	0.000139587	0	0	0	0	0	0
g__Rhodanobacter	0.000139587	0.000139587	0	0	0.000139587	0.00041876	0	0	0	0	0	0	0	0	0	0	0	0
g__Sulfurospirillum	0.000558347	0	0.000279174	0	0	0	0	0	0	0	0	0	0	0	0	0	0	0
g__Aequorivita	0	0	0	0.000139587	0	0	0	0	0	0	0	0	0	0	0	0	0	0
g__Coxiella	0.000279174	0.000279174	0.000139587	0.00656058	0.00195422	0.000977108	0	0.000279174	0.000837521	0	0	0.000977108	0	0	0	0	0.000558347	0.000139587
g__Rhodocytophaga	0	0	0	0	0	0.000139587	0	0	0	0	0	0.00390843	0	0	0	0	0	0
g__Anaerostipes	0	0	0	0	0	0	0.00279174	0.000139587	0	0.000139587	0	0.00404802	0.000279174	0	0	0	0	0
g__Herbinix	0.000139587	0	0	0.000977108	0	0	0	0	0	0	0	0	0	0	0	0	0	0
g__IS-44	0.00167504	0.0011167	0.000837521	0.0041876	0.00041876	0.000279174	0	0	0	0	0.00139587	0.000139587	0	0	0	0	0	0
g__Ga0074140	0	0	0	0	0	0	0	0	0	0	0	0	0	0	0.000279174	0	0	0
g__Truepera	0	0	0	0.000139587	0.00041876	0.000139587	0	0	0	0	0	0	0	0	0	0	0	0
g__Devosia	0.0198213	0.015215	0.0113065	0.027359	0.0254048	0.0714685	0.0115857	0.025684	0.0187046	0.00572306	0.0178671	0.0171692	0.00502513	0.00153546	0.00307091	0.0032105	0.0113065	0.00516471
g__Polyangium_brachysporum_group	0.00307091	0.00348967	0.0107482	0.000279174	0	0.000279174	0	0	0	0	0	0	0	0	0	0	0	0
g__Spiroplasma	0.00237298	0	0.000558347	0	0	0	0	0	0	0	0	0	0	0	0	0	0	0
g__Pelagicoccus	0.000279174	0	0.000279174	0	0	0	0	0	0	0	0	0	0	0	0	0	0	0
g__Limnobacter	0	0.000139587	0	0	0.000139587	0	0	0	0	0	0	0	0	0	0	0	0	0
g__Sumerlaea	0.000279174	0.00041876	0.00041876	0.000558347	0.000139587	0.000139587	0	0	0	0	0	0	0	0	0	0	0	0
g__Clostridium_sensu_stricto_12	0.000139587	0	0	0	0	0	0	0	0	0	0	0	0	0	0	0	0	0
g__OLB12	0	0	0	0	0.000139587	0	0	0	0	0	0	0	0	0	0	0	0	0
g__Capnocytophaga	0	0	0	0	0	0	0.000139587	0.000139587	0	0.000139587	0.00628141	0	0	0	0	0	0	0
g__Ramlibacter	0.00404802	0.00600223	0.00432719	0	0.000139587	0.000279174	0	0	0	0	0	0.000697934	0	0	0	0	0	0.000697934
g__Ac37b	0	0.000139587	0	0	0	0	0	0	0	0	0	0	0	0	0	0	0	0
g__Paenibacillus	0.00153546	0.000977108	0.0011167	0.0219151	0.0213568	0.00781686	0.00558347	0.00558347	0.00572306	0.00307091	0.0171692	0.0107482	0	0.000697934	0.000558347	0.000139587	0.000977108	0.00404802
g__Luedemannella	0.000279174	0	0.00041876	0.00041876	0.00041876	0	0.000139587	0.000697934	0.00139587	0.000139587	0.00279174	0.00265215	0	0	0	0	0	0
g__MND1	0.00711893	0.00460637	0.00977108	0.000837521	0.000837521	0.000977108	0	0.00265215	0	0	0	0	0.000279174	0	0	0	0	0
g__Halomonas	0.000139587	0	0	0	0	0	0	0	0	0	0	0	0	0	0	0	0	0
g__uncultured_Chlamydiales_bacterium	0	0	0	0	0	0	0	0	0	0.000139587	0.000139587	0.000977108	0	0	0	0	0	0
g__Shimazuella	0	0	0.000279174	0	0	0	0	0	0	0	0	0	0	0	0	0	0	0
g__Quadrisphaera	0	0.000139587	0	0.000139587	0	0	0.00223339	0.000139587	0.00153546	0	0	0	0	0.00041876	0.000558347	0	0	0
g__Alcanivorax	0	0	0	0	0	0	0	0	0	0.000139587	0.000139587	0.00139587	0	0	0	0	0	0
g__Clostridium_sensu_stricto_1	0.000279174	0	0	0.000279174	0	0	0.00488554	0.000139587	0	0	0	0	0	0	0	0	0	0
g__Paracoccus	0	0.000139587	0	0	0.000139587	0	0.00181463	0.000837521	0.00265215	0.000697934	0.00279174	0	0.000279174	0.000558347	0.000279174	0	0	0.000139587
g__Hymenobacter	0	0	0	0	0	0	0.00195422	0	0	0	0	0	0.000139587	0	0	0.000139587	0	0
g__Caryophanon	0	0	0	0	0	0	0.00139587	0.000139587	0	0.0011167	0	0.000279174	0	0	0	0	0	0
g__Gaiella	0.00293132	0.00237298	0.0020938	0.000558347	0.000139587	0	0.000139587	0.00041876	0	0.000697934	0.00488554	0.000697934	0	0.000139587	0.000139587	0	0	0
g__Propionivibrio	0	0.000279174	0.000139587	0	0	0	0	0	0	0	0	0	0	0	0	0	0	0
g__Niveispirillum	0	0.00041876	0	0	0	0	0	0	0	0	0	0	0	0	0	0	0	0
g__Acrocarpospora	0.000139587	0	0.000279174	0	0	0	0	0	0	0	0	0	0	0	0	0	0	0
g__Lachnospiraceae_NK4A136_group	0	0	0	0	0	0	0	0	0	0	0.000697934	0	0	0.000139587	0	0	0	0
g__Promicromonospora	0.000139587	0	0	0	0.00251256	0	0	0	0	0.00041876	0.00265215	0	0	0	0	0	0	0
g__Niastella	0.00558347	0.00753769	0.0177275	0.00265215	0.00041876	0.000279174	0	0	0	0	0	0	0	0	0	0	0	0
g__Lysobacter	0	0	0	0.000558347	0.000139587	0.00195422	0.00139587	0.00376884	0.00460637	0.000697934	0.00041876	0.000279174	0.0226131	0.00153546	0.000279174	0	0	0
g__Pseudarthrobacter	0	0	0	0.000279174	0.00167504	0.000697934	0.00376884	0.000697934	0.00502513	0.0073981	0.0311279	0.0228922	0.000279174	0.000139587	0.000279174	0.00460637	0.000558347	0.0125628
g__Sphingobium	0.000837521	0.00041876	0.000697934	0.00181463	0.00153546	0.000837521	0.0120045	0.0142379	0.00683975	0.00195422	0.0147962	0.000279174	0.0491346	0.0110274	0.0261027	0.000558347	0.0175879	0.00195422
g__Spirosoma	0	0	0	0	0	0	0	0	0	0.000139587	0.000139587	0.00502513	0	0	0.000558347	0	0	0
g__Agromyces	0.00167504	0.000977108	0.000558347	0.00125628	0.00195422	0.00237298	0.000139587	0.000977108	0.0011167	0	0	0	0.00041876	0	0.000139587	0	0	0
g__Dongia	0.0142379	0.0214964	0.0147962	0.000977108	0.00153546	0.000279174	0.00809604	0.00795645	0.0642099	0	0	0.00181463	0.00279174	0.00153546	0.000558347	0	0	0.000837521
g__Candidatus_Competibacter	0.000139587	0.00041876	0.000139587	0	0	0	0	0	0	0	0	0	0	0	0	0	0	0
g__Fluviicola	0.000837521	0	0.000697934	0	0	0.000139587	0	0	0	0	0	0.000279174	0	0	0	0	0	0
g__Pedomicrobium	0.0032105	0.00586265	0.00767727	0.00725852	0.0053043	0.00335008	0.00502513	0.00376884	0.00516471	0.00251256	0.00586265	0.000279174	0	0.000697934	0	0.00767727	0	0
g__Gemmobacter	0.000139587	0.000279174	0	0	0	0	0	0	0	0	0	0	0	0	0	0	0	0
g__BD1-7_clade	0	0	0.000279174	0	0	0	0	0	0	0	0	0	0	0	0	0	0	0
g__Tagaea	0.000139587	0	0.000139587	0	0	0	0	0	0	0	0	0	0	0	0	0	0	0
g__Paenarthrobacter	0.0011167	0.00153546	0.000697934	0.00697934	0.0343384	0.0157733	0	0	0	0	0	0	0	0	0	0	0	0
g__Brevundimonas	0.000558347	0.000279174	0	0.00125628	0.000697934	0.00725852	0.0731435	0.0400614	0.0207984	0.0399218	0.143076	0.031407	0.0150754	0.00404802	0.0085148	0.0224735	0.0041876	0.00376884
g__Entomoplasma	0.000139587	0	0	0	0	0.000837521	0	0	0	0	0	0	0	0	0	0	0	0
g__uncultured_beta_proteobacterium	0.000279174	0.000279174	0.000279174	0	0	0	0.000279174	0.00181463	0	0	0	0	0	0	0	0	0	0
g__Aminobacter	0.00041876	0.000558347	0.00041876	0.00195422	0.00181463	0.00781686	0	0.00041876	0.000279174	0.00153546	0.000697934	0.0259631	0.000139587	0.000139587	0.000139587	0.000139587	0.00460637	0.000139587
g__Kaistia_sp._enrichment_culture_clone_35Fe70	0.00041876	0.000139587	0	0	0	0	0	0	0	0	0	0	0	0	0	0	0	0
g__Vicinamibacter	0.000697934	0.00279174	0.00153546	0.00404802	0.00446678	0.00335008	0	0	0	0	0	0	0	0	0	0	0	0
g__uncultured_Acidobacteria_bacterium	0.00516471	0.00488554	0.00753769	0.00237298	0.00181463	0.00125628	0	0	0	0	0	0	0	0	0	0	0	0
g__Anaerovorax	0	0	0	0.000139587	0	0	0	0	0	0	0	0	0	0	0	0	0	0
g__Acinetobacter	0.00041876	0	0	0	0	0	0.0111669	0.00600223	0.00921273	0.00656058	0.0473199	0.00809604	0.00139587	0.00167504	0.00041876	0.0219151	0.0281965	0.000279174
g__SCGC_AAA164-E04	0.000139587	0	0	0.000837521	0.000139587	0	0	0	0	0	0	0	0	0	0	0	0	0
g__Agreia	0	0	0	0	0	0	0.0107482	0.0223339	0.00265215	0.00893356	0.00544389	0.0100503	0.0011167	0.000139587	0.000697934	0.0495533	0.0759352	0.03378
g__Sphingomonas_sp.	0.000139587	0.000139587	0	0	0	0	0	0	0	0	0	0	0	0	0	0	0	0
g__Ellin6067	0.00390843	0.00781686	0.00474595	0.0011167	0.000697934	0.00041876	0.000977108	0.000837521	0.00153546	0	0	0	0.000139587	0.000837521	0.000279174	0	0	0
g__Cryptosporangium	0	0.000139587	0	0	0	0	0	0	0.00041876	0	0	0	0	0	0	0	0	0
g__uncultured_Hyphomicrobiaceae_bacterium	0	0	0	0	0	0	0	0	0	0	0	0	0	0	0	0	0	0.000558347
g__uncultured_Iamia_sp.	0.00293132	0.00139587	0.000697934	0.0118649	0.00265215	0	0	0	0	0	0	0	0	0	0	0	0	0
g__Bradyrhizobium	0.00711893	0.00935232	0.00697934	0.0117253	0.00586265	0.0094919	0.00167504	0.00572306	0.00279174	0.00237298	0.00544389	0.00237298	0.00265215	0	0.00181463	0.000558347	0.000697934	0.000558347
g__Clostridium_sensu_stricto_3	0	0.000139587	0	0	0.000279174	0	0	0	0	0	0	0	0	0	0	0	0	0
g__Oxalicibacterium	0.00041876	0.000279174	0.0011167	0.000279174	0.00167504	0.00656058	0	0	0	0	0	0	0	0	0	0	0	0
g__Brachybacterium	0	0	0	0.000139587	0	0	0	0.00139587	0.000697934	0.000279174	0	0	0	0	0	0	0	0
g__Raineya	0	0	0.000558347	0	0	0	0	0	0	0	0	0	0	0	0	0	0	0
g__Mobilisporobacter_senegalensis	0	0	0	0.000139587	0.000139587	0	0	0	0	0	0	0	0	0	0	0	0	0
g__uncultured_Gracilibacter_sp.	0	0	0	0.000139587	0.000558347	0	0	0	0	0	0	0	0	0	0	0	0	0
g__Bryobacter	0.00335008	0.00335008	0.00474595	0.0011167	0.000139587	0.000558347	0.00265215	0	0.00516471	0.0020938	0.00265215	0.00390843	0	0	0	0	0.000139587	0.000139587
g__Ferrovibrio	0.00432719	0.00223339	0.000837521	0	0.000279174	0.000139587	0	0	0	0	0	0	0	0	0.00041876	0	0	0
g__Lautropia	0.000279174	0.000139587	0.000139587	0.000139587	0.000279174	0.000697934	0	0	0	0.000558347	0.000139587	0.00376884	0.000139587	0.000558347	0	0	0	0
g__Haemophilus	0	0	0	0	0	0	0.000279174	0.000279174	0.000139587	0.000139587	0.000279174	0.00279174	0.000139587	0.000139587	0.000139587	0.000139587	0	0
g__Gemmata	0.000697934	0.00167504	0.000837521	0.000558347	0	0.000279174	0	0	0	0	0	0	0	0	0	0	0	0
g__Enteractinococcus	0	0	0	0.000139587	0	0	0	0	0	0	0	0	0	0	0	0	0	0
g__Dyadobacter	0.000558347	0.000279174	0.000139587	0.000279174	0.000837521	0.00223339	0.000279174	0.000558347	0	0.000279174	0	0	0.000977108	0.000139587	0.000558347	0.0127024	0.0011167	0.00223339
g__Steroidobacter	0.00935232	0.0163317	0.0153546	0.0175879	0.0085148	0.0213568	0	0.000139587	0	0	0.000697934	0	0.000139587	0.000697934	0	0	0	0
g__Nannocystis	0.000139587	0.00041876	0	0.00223339	0.000837521	0.000139587	0	0	0	0	0	0	0	0	0	0	0	0
g__Granulicatella	0	0	0	0	0	0	0	0	0	0	0	0	0	0.000139587	0.000139587	0	0	0.000837521
g__Aerococcus	0	0	0	0	0	0	0.0011167	0.00125628	0.000139587	0.000279174	0.00223339	0	0	0	0	0	0.0011167	0
g__Fusicatenibacter	0	0	0	0	0	0	0	0	0	0	0	0	0	0.000558347	0	0	0	0
g__Aquamicrobium	0	0	0	0.000279174	0	0	0	0	0	0	0	0	0	0	0	0	0	0
g__OM27_clade	0.00125628	0.00041876	0.000139587	0.000558347	0.000279174	0.000139587	0.000139587	0.000977108	0.000558347	0	0	0	0	0	0	0	0	0
g__uncultured_soil_bacterium	0.00251256	0.000837521	0.00153546	0.000558347	0.000558347	0.00041876	0	0	0	0	0	0	0	0	0	0	0	0
g__Rhodoferax	0	0.000139587	0	0	0	0.000139587	0	0	0	0	0	0.00195422	0	0	0.000139587	0	0	0.00404802
g__Corynebacterium	0	0	0	0	0	0	0.00390843	0.00139587	0.0163317	0.000697934	0.000139587	0.00656058	0.00195422	0.000279174	0	0.000977108	0	0.000279174
g__CL500-29_marine_group	0.0011167	0.000977108	0.000837521	0.000977108	0.00167504	0.000837521	0	0.000837521	0.000977108	0.000279174	0.000558347	0.00139587	0	0	0	0	0	0
g__Nonomuraea	0.0011167	0.00139587	0.00167504	0	0	0	0	0	0	0	0	0	0	0	0	0	0	0
g__Zhizhongheella	0.000139587	0.000139587	0.000139587	0	0	0	0	0	0	0	0	0	0	0	0	0	0	0
g__Erwinia	0	0	0	0	0	0.000279174	0	0	0	0	0	0	0	0	0	0	0	0
g__Aureimonas	0	0	0	0	0.000139587	0	0.000837521	0.00390843	0.00488554	0	0	0.00237298	0.00167504	0	0	0	0	0.000139587
g__Limibaculum	0	0	0.000139587	0	0	0	0.00153546	0	0.000139587	0	0	0	0	0	0.000279174	0	0	0
g__uncultured_Chloroflexi_bacterium	0.000558347	0.000977108	0.000977108	0.000837521	0.000279174	0.000279174	0	0	0	0	0	0	0	0	0	0	0	0
